# Supplementary material for: Lactobacillus plantarum gene clusters encoding putative cell-surface protein complexes for carbohydrate utilization are conserved in specific gram-positive bacteria
Source: PubMed Central journal article supplement (PMC1534035; doi:10.1186/1471-2164-7-126), 2006-05-24
Supplement: 1471-2164-7-126-S1.pdf [file 1471-2164-7-126-S1.pdf]

**Table 4: Summary of *csc* genes and gene clusters.**

Gene numbering is according to ERGO. Table 8 contains conversions to SwissProt numbers.

| Complete genomes      | ERGO code | Cluster-number | <i>cscC</i> | <i>cscD</i> | <i>cscA</i>    | <i>cscB</i>    | comments             |
|-----------------------|-----------|----------------|-------------|-------------|----------------|----------------|----------------------|
| L.plantarum WCFS1     | LPL       |                | 0297        |             |                |                |                      |
|                       |           | I              |             | 1447        | 1448           | 1446/1449/1450 |                      |
|                       |           | II             | 2173        |             | 2174           | 2175           |                      |
|                       |           | III            | 2975        | 2976        | 2977           | 2978           |                      |
|                       |           | IV             | 3064        | 3065        | 3066           | 3067*          | *contains stop codon |
|                       |           | V              | 3075        | 3074        | 3072           | 3073           |                      |
|                       |           | VI             | 3117        |             | 3115           | 3116           |                      |
|                       |           | VII            |             |             | 3413           | 3412/3414      |                      |
|                       |           | VIII           | 3450        | 3454        | 3451           | 3452/3453      |                      |
| IX                    | 3676      | 3677           | 3678        | 3679        |                |                |                      |
| L.monocytogenes EGD-e | LMO       | I              | 0549        | 0550        | 0552           | 0551           |                      |
|                       |           | II             | 0587        |             | 0586           | 0585           |                      |
| L.innocua Clip 11262  | LIN       | I              | 0552        | 0553        | 0555           | 0554           |                      |
|                       |           | II             | 0557        | 0558        | 0560           | 0559           |                      |
|                       |           | III            | 0595        |             | 0594           | 0593           |                      |
| E.faecalis V583       | EF        |                |             |             | 0803           |                |                      |
|                       |           | I              |             | 0340        | 0339           | 0338           |                      |
|                       |           | II             |             | 3172        | 0404           | 0403/0405/0406 |                      |
|                       |           | III            | 1001        | 0998        | 1003           | 0999/1000/1002 |                      |
|                       |           | IV             | 1892        | -           | 1894           | 1893           |                      |
|                       |           |                |             |             | 2027/2028/2029 |                |                      |
|                       |           |                |             |             | 2238           |                |                      |
|                       |           | V              | 2913A       | 2913        | 2289           | 2287/2288      |                      |

|                      |      |      |            |      |                 |                     |                                    |
|----------------------|------|------|------------|------|-----------------|---------------------|------------------------------------|
|                      |      | VI   | 2660       | 3203 | 2664            | 2661/2662/2663      |                                    |
| L.lactis IL1403      | LLX  | I    | 1219       | 1220 | 1222-1223*      | 1221                | * frameshift                       |
|                      |      | II   |            | 1388 | 1385-1386*/1389 | 1387                | * frameshift                       |
|                      |      | III  | 1616       | 1621 | 1614-1615*      | 1617/1618/1619/1620 | * stop codon between 1614 and 1615 |
| B.cereus ZK          | BCU  | I    | 0750       | 0751 | 0754            | 0752/753            |                                    |
| B.cereus ATCC10987 # | BCEA | I    | 0044       |      | 0045            | 0046                | on plasmid                         |
| B.anthraxis A2012    | BAT  | I    | 7092-7093* |      | 7091            | 7090                | on plasmid; * frameshift           |
| L.sakei 23K #        | LSA  | I    | 0172       |      | 0173-0174*/0175 | 0177                | *frameshift                        |
|                      |      | II   | 0211-0212* |      | 0213            | 0215                | *frameshift                        |
|                      |      | III  | 0613-0614* | 0612 | 0610            | 0611                | *frameshift                        |
|                      |      | IV   | 1283       | 1284 | 1285-1286c*     | 1287                | * interrupted by IS                |
|                      |      | V    | 1730-1731* |      | 1727-1728*/1729 | 1725                | *frameshift                        |
|                      |      | VI   |            |      | 1810            | 1811                |                                    |
|                      |      | VII  |            |      | 1816            | 1815                |                                    |
|                      |      | VIII | 1820       |      | 1818-1819*      | 1821                | *frameshift                        |

| <b>Incomplete genomes</b> | <b>ERGO code</b> | <b>Cluster-number</b> | <b><i>cscC</i></b> | <b><i>cscD</i></b> | <b><i>cscA</i></b> | <b><i>cscB</i></b>  | <b>comments</b>            |
|---------------------------|------------------|-----------------------|--------------------|--------------------|--------------------|---------------------|----------------------------|
| L.lactis cremoris SK11    | LCR              | I                     | 0181               |                    | 0179               | 0180                | 0178 encodes transposase   |
|                           |                  | II                    | 0187               |                    | 0188               |                     |                            |
|                           |                  | III                   | 0710A              | 0709A              | 0709               | 0710                |                            |
|                           |                  | IV                    |                    | 1204A              | 1206-1207*         | 1205                | small contig; * frameshift |
|                           |                  | V                     |                    | 1445               |                    | 1441/1442/1443/1444 | 1441 is end of contig      |
|                           |                  |                       |                    | 1867               |                    | only gene on contig |                            |

|                           |     |      |            |       |             |             |                                        |                            |
|---------------------------|-----|------|------------|-------|-------------|-------------|----------------------------------------|----------------------------|
| P.pentosaceus ATCC25745   | PPE | I    | 0545       | 0546  | 0547        | 0548        |                                        |                            |
|                           |     | II   |            |       | 0557        | 0558        |                                        |                            |
| E.faecium DO              | EFA | I    | 3594       | 3606  | 3601        | 4241        |                                        |                            |
|                           |     | II   | 3967       |       | 3978-3983** | 3975        | ** stopcodon between 3978 and 3983     |                            |
|                           |     | III  | 3340       |       | 4468        | 3344-3344A* | * frameshift                           |                            |
| L.brevis ATCC367          | LBR |      | 0331       |       |             |             | small contig                           |                            |
|                           |     | I    | 0625       |       |             | 0624        | small contig                           |                            |
|                           |     |      | 0959       |       |             |             |                                        |                            |
|                           |     |      | 1027-1028* |       |             |             |                                        | small contig, * frameshift |
|                           |     | 1269 |            |       |             |             |                                        |                            |
| L.mesenteroides ATCC8293  | LME | I    | 0911       | 0910A | 0909        | 0910        | 909 end of contig, 910A orf missed     |                            |
| L.casei ATCC334           | LCA |      |            |       | 0104        |             | small contig                           |                            |
|                           |     | I    |            |       | 0270-0271*  | 0269        | small contig, * N-term missing         |                            |
|                           |     | II   | 0293*      | 0294  | 0297        | 0295/0296   | contig is 293-298, * N-term missing    |                            |
|                           |     | III  | 0329       | 0327A |             | 0327*/0328  | small contig, * N-term missing         |                            |
|                           |     | IV   | 0972*      | 0971  | 0970        |             | small contig 970-972, * C-term missing |                            |
| B.thuringiensis ATCC35646 | BTH | I    | 3761       | 3760  | 3757        | 3758/3759   |                                        |                            |
| O.oeni PSU-1              | OOE | I    |            |       | 1273-1274*  | 1275        | *frameshift                            |                            |

# NCBI numbering
