# Supplementary material for: Lactobacillus plantarum gene clusters encoding putative cell-surface protein complexes for carbohydrate utilization are conserved in specific gram-positive bacteria
Source: PubMed Central journal article supplement (PMC1534035; doi:10.1186/1471-2164-7-126), 2006-05-24
Supplement: 1471-2164-7-126-S2.pdf [file 1471-2164-7-126-S2.pdf]

**Table 5: Predicted properties of encoded Csc proteins**<sup>a</sup>New residue length after start correction; old length in parenthesis.

n.a. not applicable

| <b>CscA</b>           |                       |      |                        |                       |                     |           |                 |
|-----------------------|-----------------------|------|------------------------|-----------------------|---------------------|-----------|-----------------|
|                       | <b>ERGO gene code</b> |      | <b>AA <sup>a</sup></b> | <b>signal peptide</b> | <b>gene cluster</b> | <b>pI</b> | <b>Comments</b> |
| L.plantarum WCFS1     | LPL                   | 1448 | 348                    | +                     | 1446-1450           | 10.63     |                 |
|                       | LPL                   | 2174 | 349                    | +                     | 2173-2175           | 11.31     |                 |
|                       | LPL                   | 2977 | 347                    | +                     | 2975-2978           | 10.56     |                 |
|                       | LPL                   | 3066 | 354                    | +                     | 3064-3067           | 10.85     |                 |
|                       | LPL                   | 3072 | 347                    | +                     | 3069-3075           | 10.72     |                 |
|                       | LPL                   | 3115 | 353                    | +                     | 3115-3117           | 10.74     |                 |
|                       | LPL                   | 3413 | 344                    | +                     | 3412-3414           | 10.73     |                 |
|                       | LPL                   | 3451 | 337                    | +                     | 3450-3454           | 10.53     |                 |
|                       | LPL                   | 3678 | 353                    | +                     | 3676-3679           | 11.10     |                 |
| L.monocytogenes EGD-e | LMO                   | 0552 | 343                    | +                     | 0552-0555           | 8.72      |                 |
|                       | LMO                   | 0586 | 341                    | +                     | 0585-0587           | 9.59      |                 |
| L.innocua Clip 11262  | LIN                   | 0555 | 343                    | +                     | 0551-0560           | 6.2       |                 |
|                       | LIN                   | 0560 | 343                    | +                     | 0551-0560           | 8.79      |                 |
|                       | LIN                   | 0594 | 341                    | +                     | 0593-0595           | 9.74      |                 |
|                       | LIN                   | 0803 | 330                    | +                     |                     |           |                 |
| E.faecalis V583       | EF                    | 0339 | 377                    | +                     | 0338-0340           | 8.76      |                 |
|                       | EF                    | 0404 | 349                    | +                     | 403-406,3172        | 10.26     |                 |
|                       | EF                    | 0981 | 354                    | +                     |                     | 9.58      |                 |

|                        |      |      |          |      |                |       |                                                            |
|------------------------|------|------|----------|------|----------------|-------|------------------------------------------------------------|
|                        | EF   | 1003 | 364      | +    | 0998-1003      | 9.62  |                                                            |
|                        | EF   | 1894 | 344(314) | +    | 1892-1894      | 7.23  | new start at nucleotide 665685 (ATG)                       |
|                        | EF   | 2289 | 341      | +    | 2913,2287-2289 | 4.94  |                                                            |
|                        | EF   | 2664 | 360(358) | +    | 2660-2666,3203 | 7.56  | new start at nucleotide 3056841 (ATG)                      |
| B.anthraxis A2012      | BAT  | 7091 | 360(362) | ?    | 7090-7093      | 9.27  | new start at nucleotide 78625 (ATG)                        |
| L.lactis IL 1403       | LLX  | 1222 | 189(215) | +    | 1219-1223      | 10.27 | new start at nucleotide 1220573 (ATG),frameshift with 1223 |
|                        | LLX  | 1223 | 187      | n.a. | 1219-1223      | 9.71  | frameshift with 1222                                       |
|                        | LLX  | 1385 | 108      | n.a. | 1385-1389      | 9.89  | frameshift with 1386                                       |
|                        | LLX  | 1386 | 289      | +    | 1385-1389      | 5.48  | frameshift with 1385                                       |
|                        | LLX  | 1389 | 334      | +    | 1385-1389      | 9.32  |                                                            |
|                        | LLX  | 1614 | 259      | n.a. | 1614-1621      | 9.51  | stopcodon between 1614 and 1615                            |
|                        | LLX  | 1615 | 124      | +    | 1614-1621      | 4.77  | stopcodon between 1614 and 1615                            |
| B. cereus ZK           | BCU  | 0754 | 341      | +    | 0750-0754      | 7.61  |                                                            |
| B. cereus ATCC10987    | BCEA | 0045 | 361      | ?    | 0044-0046      |       | plasmid; NCBI gene code                                    |
| L.lactis cremoris SK11 | LCR  | 0179 | 376      | +    | 0179-0181      | 9.79  |                                                            |
|                        | LCR  | 0188 | 333      | +    | 0187-0188      | 9.89  |                                                            |
|                        | LCR  | 0709 | 376      | +    | 0709-0710      | 9.30  |                                                            |
|                        | LCR  | 1206 | 319      | +    | 1204A-1207     | 9.27  | frameshift with 1207                                       |
|                        | LCR  | 1207 | 68       | n.a  | 1204A-1207     | 9.78  | frameshift with 1206                                       |
|                        | LCR  | 1867 | 336      | +    |                | 9.88  |                                                            |

|                           |     |      |     |      |                     |       |                                       |
|---------------------------|-----|------|-----|------|---------------------|-------|---------------------------------------|
| P.pentosaceus ATCC25745   | PPE | 0547 | 352 | +    | 545-548             | 10.86 |                                       |
|                           | PPE | 0557 | 323 | +    | 557-558             | 10.72 |                                       |
| E.faecium DO              | EFA | 3601 | 344 | +    | 3601,3606,3594,4241 | 4.93  |                                       |
|                           | EFA | 3978 | 181 | +    | 3972-3983           | 7.60  | stopcodon between 3978 and 3983       |
|                           | EFA | 3983 | 151 | n.a  | 3967-3983           | 9.87  | stopcodon between 3978 and 3983       |
|                           | EFA | 4468 | 358 | +    | 880-3344A           | 4.87  |                                       |
| L.mesenteroides ATCC8293  | LME | 0909 | 276 | +    | 0909-0911           | 9.68  | C-term missing, end contig            |
| L.casei ATCC334           | LCA | 0104 | 344 | +    | -                   | 10.33 |                                       |
|                           | LCA | 0270 | 360 | +    | 0269-0271           | 10.99 |                                       |
|                           | LCA | 0271 | 287 | -    | 0269-0271           | 10.36 | N-term missing, no RBS                |
|                           | LCA | 0297 | 359 | +    | 0293-0298           | 9.90  |                                       |
|                           | LCA | 0970 | 336 | +    | 0970-0972           | 10.17 |                                       |
| B.thuringiensis ATCC35646 | BTH | 3757 | 247 | +    | 3757-3761           | 5.54  | C-terminally truncated; end of contig |
| O.oeni PSU-1              | OOE | 1273 | 164 | n.a  | 1273-1275           | 11.11 | frameshift with 1274                  |
|                           | OOE | 1274 | 166 | +    | 1273-1275           | 11.25 | frameshift with 1273                  |
| L.sakei 23K               | LSA | 0173 | 259 | +    | 0172-0177           |       | frameshift with 0174                  |
|                           |     | 0174 | 90  | n.a. | 0172-0177           |       | frameshift with 0173                  |
|                           |     | 0175 | 342 | +    | 0172-0177           |       |                                       |
|                           |     | 0213 | 345 | +    | 0211-0215           |       |                                       |
|                           |     | 0610 | 351 | +    | 0610-0614           |       |                                       |
|                           |     | 1285 | 193 | n.a. | 1283-1287           |       | separated from 1286c by IS            |

|       |          |      |           |                                                 |
|-------|----------|------|-----------|-------------------------------------------------|
| 1286c | 158      | +    | 1283-1287 | separated from 1285 by IS                       |
| 1727  | 82       | n.a. | 1725-1731 | frameshift with 1728                            |
| 1728  | 272(262) | +    | 1725-1731 | new start at 1709904(ATG), frameshift with 1727 |
| 1729  | 345(327) | +    | 1725-1731 | new start at 1710946(GTG)                       |
| 1810  | 350(335) | +    | 1810-1811 | new start at 1802205(ATG)                       |
| 1816  | 337      | +    | 1815-1816 |                                                 |
| 1818  | 28       | n.a. | 1818-1821 | frameshift with 1819                            |
| 1819  | 293      | +    | 1818-1821 | frameshift with 1818                            |

### CscB

|                       | ERGO gene code | AA <sup>a</sup> | signal peptide | gene cluster | pI        | Comments |                                         |
|-----------------------|----------------|-----------------|----------------|--------------|-----------|----------|-----------------------------------------|
| L.plantarum WCFS1     | LPL            | 1446            | 1092           | +            | 1446-1450 | 4.85     |                                         |
|                       | LPL            | 1449            | 226            | +            | 1446-1450 | 7.51     |                                         |
|                       | LPL            | 1450            | 234            | +            | 1446-1450 | 4.14     |                                         |
|                       | LPL            | 2175            | 243            | +            | 2173-2175 | 4.65     |                                         |
|                       | LPL            | 2978            | 260            | +            | 2975-2978 | 4.38     |                                         |
|                       | LPL            | 3067            | 234            | +            | 3064-3067 | 4.37     | contains stopcodon, new stop at 2729791 |
|                       | LPL            | 3073            | 202            | +            | 3069-3075 | 4.65     |                                         |
|                       | LPL            | 3116            | 190            | +            | 3115-3117 | 4.84     |                                         |
|                       | LPL            | 3412            | 1136           | +            | 3412-3414 | 4.91     |                                         |
|                       | LPL            | 3414            | 269            | +            | 3412-3414 | 4.66     |                                         |
|                       | LPL            | 3452            | 230            | +            | 3450-3454 | 4.91     |                                         |
|                       | LPL            | 3453            | 190            | +            | 3450-3454 | 4.37     |                                         |
|                       | LPL            | 3679            | 245            | +            | 3676-3679 | 4.24     |                                         |
| L.monocytogenes EGD-e | LMO            | 0551            | 280            | +            | 0549-0552 | 4.14     |                                         |

|                      |     |      |          |   |                |      |                                     |
|----------------------|-----|------|----------|---|----------------|------|-------------------------------------|
|                      | LMO | 0585 | 237      | + | 0585-0587      | 4.33 |                                     |
| L.innocua Clip 11262 | LIN | 0554 | 280      | + | 0552-0555      | 4.25 |                                     |
|                      | LIN | 0559 | 280      | + | 0557-0560      | 4.55 |                                     |
|                      | LIN | 0593 | 237      | + | 0593-0595      | 4.43 |                                     |
| E.faecalis V583      | EF  | 0338 | 229      | + | 0338-0340      | 4.31 |                                     |
|                      | EF  | 0403 | 222      | + | 0403-0406,3172 | 4.68 |                                     |
|                      | EF  | 0405 | 711(647) | + | 0403-0406,3172 | 4.42 | new start at nucleotide 2174870     |
|                      | EF  | 0406 | 1004     | + | 0403-0406,3172 | 4.2  | different and longer N-term         |
|                      | EF  | 0999 | 243      | + | 0998-1003      | 4.54 |                                     |
|                      | EF  | 1000 | 259      | + | 0998-1003      | 5.13 |                                     |
|                      | EF  | 1002 | 246      | + | 0998-1003      | 4.28 |                                     |
|                      | EF  | 1893 | 245      | + | 1892-1894      | 7.67 |                                     |
|                      | EF  | 2027 | 232      | + | 2027-2029      | 4.54 |                                     |
|                      | EF  | 2028 | 236      | + | 2027-2029      | 4.41 |                                     |
|                      | EF  | 2029 | 238      | + | 2027-2029      | 4.41 |                                     |
|                      | EF  | 2238 | 239      | + | 2238           | 4.71 |                                     |
|                      | EF  | 2287 | 260      | + | 2913,2287-2289 | 4.39 |                                     |
|                      | EF  | 2288 | 258      | + | 2913,2287-2289 | 4.55 |                                     |
|                      | EF  | 2661 | 244      | + | 2660-2666,3203 | 4.65 |                                     |
|                      | EF  | 2662 | 266      | + | 2660-2666,3203 | 4.57 |                                     |
|                      | EF  | 2663 | 252      | + | 2660-2666,3203 | 4.61 |                                     |
| B.anthraxis A2012    | BAT | 7090 | 200(202) | + | 7090-7093      | 9.68 | new start at nucleotide 77949 (ATG) |
| L.lactis IL 1403     | LLX | 1221 | 176      | + | 1219-1223      | 5.66 |                                     |

|                         |      |       |          |     |                     |      |                                                                                         |
|-------------------------|------|-------|----------|-----|---------------------|------|-----------------------------------------------------------------------------------------|
|                         | LLX  | 1387  | 270      | +   | 1385-1389           | 4.81 |                                                                                         |
|                         | LLX  | 1617  | 251      | +   | 1614-1621           | 4.22 |                                                                                         |
|                         | LLX  | 1618  | 252      | +   | 1614-1621           | 8.76 |                                                                                         |
|                         | LLX  | 1619  | 263(143) | +   | 1614-1621           | 4.97 | new start at nucleotide 1626944 (ATG) with SP in other frame                            |
|                         | LLX  | 1620  | 281      | +   | 1614-1621           | 4.09 |                                                                                         |
| B.cereus ZK             | BCU  | 0752  | 261      | +   | 0750-0754           | 4.58 |                                                                                         |
|                         | BCU  | 0753  | 251      | +   | 0750-0754           | 4.76 |                                                                                         |
| B.cereus ATCC10987      | BCEA | 0046  | 201      |     | 0044-0046           |      | plasmid; NCBI gene code                                                                 |
| L.lactis cremoris SK11  | LCR  | 0180  | 238      | +   | 0179-0181           | 6.52 |                                                                                         |
|                         | LCR  | 0710  | 235(157) | +   | 0709-0710           | 4.36 | new start at nucleotide 29343 (TAT, ATG in other frame)                                 |
|                         | LCR  | 1205  | 270      | +   | 1204A-1207          | 4.65 |                                                                                         |
|                         | LCR  | 1441  | 240      | +   | 1441-1445           | 4.39 |                                                                                         |
|                         | LCR  | 1442  | 252      | +   | 1441-1445           | 5.97 |                                                                                         |
|                         | LCR  | 1443  | 263      | +   | 1441-1445           | 4.19 |                                                                                         |
|                         | LCR  | 1444  | 281      | +   | 1441-1445           | 4.1  |                                                                                         |
|                         |      |       |          |     |                     |      |                                                                                         |
| P.pentosaceus ATCC25745 | PPE  | 0548  | 217      | +   | 0545-0548           | 5.6  |                                                                                         |
|                         | PPE  | 0558  | 162      | +   | 0557-0558           | 4.36 |                                                                                         |
| E.faecium. DO           | EFA  | 3344  | 191      | n.a | 0880-3344A          | 9.52 | frameshift with 3344A                                                                   |
|                         | EFA  | 3344A | 80       | +   | 0880-3344A          |      | new orf: start at nucleotide 11891(ATG), stop at nucleotide 11649, frameshift with 3344 |
|                         | EFA  | 3975  | 252      | +   | 3967-3983           | 4.07 |                                                                                         |
|                         | EFA  | 4241  | 226      | +   | 3601,3606,3594,4241 | 4.15 |                                                                                         |

|                           |     |      |           |   |           |      |                                         |
|---------------------------|-----|------|-----------|---|-----------|------|-----------------------------------------|
| L.brevis ATCC367          | LBR | 0624 | 199       | + | 0623-0625 | 4.25 |                                         |
| L.mesenteroides ATCC8293  | LME | 0910 | 259       | + | 0909-0911 | 5.27 |                                         |
| L.casei ATCC334           | LCA | 0269 | 299       | + | 0269-0271 | 4.64 |                                         |
|                           | LCA | 0295 | 257       | + | 0293-0298 | 4.94 |                                         |
|                           | LCA | 0296 | 247       | + | 0293-0298 | 6.28 |                                         |
|                           | LCA | 0327 | 220       | - | 0327-0329 | 4.45 | end of contig; N-terminally truncated ? |
|                           | LCA | 0328 | 234       | + | 0327-0329 | 9.49 |                                         |
| B.thuringiensis ATCC35646 | BTH | 3758 | 249       | + | 3757-3761 | 5.00 |                                         |
|                           |     | 3759 | 242       | + | 3757-3761 | 6.56 |                                         |
| O.oeni PSU-1              | OOE | 1275 | 191       | + | 1273-1275 | 3.39 |                                         |
| L.sakei 23K               | LSA | 0177 | 294       | + | 0172-0177 |      |                                         |
|                           |     | 0215 | 327       | + | 0211-0215 |      |                                         |
|                           |     | 0611 | 233       | + | 0610-0614 |      |                                         |
|                           |     | 1287 | 203       | + | 1283-1287 |      |                                         |
|                           |     | 1725 | 325       | + | 1725-1731 |      |                                         |
|                           |     | 1811 | 240       | + | 1810-1811 |      |                                         |
|                           |     | 1815 | 171(165)  | + | 1815-1816 |      | new start at 1806685(TTG)               |
| 1821                      | 200 | +    | 1818-1821 |   |           |      |                                         |

CscC

---

| ERGO gene code | AA <sup>a</sup> | signal | gene cluster | pI | Comments |
|----------------|-----------------|--------|--------------|----|----------|
|----------------|-----------------|--------|--------------|----|----------|

| peptide               |     |       |            |      |                |       |                                                                       |
|-----------------------|-----|-------|------------|------|----------------|-------|-----------------------------------------------------------------------|
| L.plantarum WCFS1     | LPL | 0297  | 685        | +    | -              | 4.89  |                                                                       |
|                       | LPL | 2173  | 482        | +    | 2173-2175      | 5.19  |                                                                       |
|                       | LPL | 2975  | 502        | +    | 2975-2978      | 8.65  |                                                                       |
|                       | LPL | 3064  | 495        | +    | 3064-3067      | 9.70  |                                                                       |
|                       | LPL | 3075  | 915        | +    | 3069-3075      | 8.23  |                                                                       |
|                       | LPL | 3117  | 750        | +    | 3115-3117      | 4.23  |                                                                       |
|                       | LPL | 3450  | 716        | +    | 3450-3454      | 4.45  |                                                                       |
|                       | LPL | 3676  | 512        | +    |                | 10.04 |                                                                       |
| L.monocytogenes EGD-e | LMO | 0549  | 673        | +    | 0549-0552      | 4.61  |                                                                       |
|                       | LMO | 0587  | 821        | +    | 0585-0587      | 4.33  |                                                                       |
| L.innocua Clip 11262  | LIN | 0552  | 701        | +    | 0552-0555      | 4.42  |                                                                       |
|                       | LIN | 0557  | 664        | +    | 0557-0560      | 5.30  |                                                                       |
|                       | LIN | 0595  | 821        | +    | 0593-0595      | 4.36  |                                                                       |
| E.faecalis V583       | EF  | 1001  | 699        | +    | 0998-1003      | 4.50  |                                                                       |
|                       | EF  | 1892  | 761(763)   | +    | 1892-1894      | 5.42  | new start at nucleotide 668843 (TTG)                                  |
|                       | EF  | 2913A | 723        | +    | 2913,2287-2289 |       | new orf, start at nucleotide 2599386(ATG), stop at nucleotide 2597215 |
|                       | EF  | 2660  | 1619(1554) | +    | 2660-2666,3203 | 4.91  | new start at nucleotide 3064471 (ATG)                                 |
| B. anthracis A2012    | BAT | 7092  | 580(582)   | +    | 7090-7093      | 8.84  | new start at nucleotide 79741(ATG), frameshift with 7093              |
|                       | BAT | 7093  | 95         | n.a. | 7090-7093      | 9.93  | frameshift with 7092                                                  |
| L.lactis IL 1403      | LLX | 1219  | 749        | -    | 1219-1223      | 4.78  | N-terminus interrupted by transposase                                 |



|                           |      |       |            |      |                     |      |                                                                                         |
|---------------------------|------|-------|------------|------|---------------------|------|-----------------------------------------------------------------------------------------|
|                           | LLX  | 1616  | 1649       | +    | 1614-1621           | 4.73 |                                                                                         |
| B.cereus ZK               | BCU  | 0750  | 898        | ?    | 0750-0754           | 4.81 |                                                                                         |
| B.cereus ATCC10987        | BCEA | 0044  | 646        | +    | 0044-0046           |      | plasmid; NCBI gene code                                                                 |
| L.lactis cremoris SK11    | LCR  | 0181  | 918        | +    | 0179-0181           | 4.56 |                                                                                         |
|                           | LCR  | 0187  | 700(672)   | n.a. | 0187-0188           | 4.41 | new start at nucleotide 19868 (TTG), frameshift with 187A                               |
|                           | LCR  | 0187A | 13         | +    |                     |      | new orf, start at nucleotide 19647(TTG), stop at nucleotide 19686, frameshift with 0187 |
|                           | LCR  | 0710A | 915        | +    | 0709-0710           |      | new orf, start at nucleotide 30157(ATG), stop at nucleotide 32904                       |
| P.pentosaceus ATCC25745   | PPE  | 0545  | 681        | +    | 0545-0548           | 7.18 |                                                                                         |
| E.faecium DO              | EFA  | 3340  | 675        | ?    | 0880-3344A          | 4.54 |                                                                                         |
|                           | EFA  | 3594  | 826        | +    | 3601,3606,3594,4241 | 5.16 |                                                                                         |
|                           | EFA  | 3967  | 1055(1036) | +    | 3967-3983           | 4.28 | new start at nucleotide 23773 (ATG)                                                     |
| L.brevis ATCC367          | LBR  | 0331  | 729        | -    |                     | 5.01 | end of contig; N-terminally truncated                                                   |
|                           | LBR  | 0625  | 715        | +    | 0623-0625           | 4.50 |                                                                                         |
|                           | LBR  | 0959  | 600        | +    |                     | 5.01 |                                                                                         |
|                           | LBR  | 1027  | 211        | n.a. | 1027-1028           | 4.10 | frameshift with 1028                                                                    |
|                           | LBR  | 1028  | 503        | +    | 1027-1028           | 4.47 | frameshift with 1027                                                                    |
|                           | LBR  | 1269  | 707        | +    |                     | 6.27 |                                                                                         |
| L. mesenteroides ATCC8293 | LME  | 0911  | 510        | +    | 0909-0911           | 4.97 |                                                                                         |

|                           |      |      |            |           |           |      |                                                                    |
|---------------------------|------|------|------------|-----------|-----------|------|--------------------------------------------------------------------|
| L.casei ATCC334           | LCA  | 0293 | 680        | -         | 0293-0298 | 6.46 | N-term missing; end of contig                                      |
|                           | LCA  | 0329 | 673        | +         | 0327-0329 | 7.02 |                                                                    |
|                           | LCA  | 0972 | 214        | +         | 0970-0972 | 9.55 | C-term missing                                                     |
| B.thuringiensis ATCC35646 | BTH  | 3761 | 861(683)   | +         | 3758-3761 | 8.66 | new start at nucleotide 5415 (TTG)                                 |
| L.sakei 23K               | LSA  | 0172 | 1311(1303) | +         | 0172-0177 |      | new start at 163816(GTG)                                           |
|                           |      | 0211 | 109(154)   | +         | 0211-0215 |      | new start at 204620(TTG), new stop at 204946, frameshift with 0212 |
|                           |      | 0212 | 1044       | n.a.      | 0211-0215 |      | frameshift with 0211                                               |
|                           |      | 0613 | 542        | n.a.      | 0610-0614 |      | frameshift with 0614                                               |
|                           |      | 0614 | 418        | +         | 0610-0614 |      | frameshift with 0613                                               |
|                           |      | 1283 | 611        | +         | 1283-1287 |      |                                                                    |
|                           |      | 1730 | 625        | n.a.      | 1725-1731 |      | frameshift with 1731                                               |
|                           |      | 1731 | 1768       | +         | 1725-1731 |      | frameshift with 1730                                               |
|                           | 1820 | 704  | +          | 1818-1821 |           |      |                                                                    |

### CscD

|                       | <b>ERGO gene code</b> | <b>AA<sup>a</sup></b> | <b>signal peptide</b> | <b>gene cluster</b> | <b>pI</b> | <b>Comments</b> |                                    |
|-----------------------|-----------------------|-----------------------|-----------------------|---------------------|-----------|-----------------|------------------------------------|
| L.plantarum WCFS1     | LPL                   | 1447                  | 123                   | +                   | 1446-1450 | 10.01           |                                    |
|                       | LPL                   | 2976                  | 125                   | +                   | 2975-2978 | 11.23           |                                    |
|                       | LPL                   | 3065                  | 141                   | +                   | 3064-3067 | 11.58           |                                    |
|                       | LPL                   | 3074                  | 123                   | +                   | 3069-3075 | 8.54            |                                    |
|                       | LPL                   | 3454                  | 92                    | -                   | 3450-3454 | 9.34            | possible frameshifts at N-terminus |
|                       | LPL                   | 3677                  | 113                   | +                   | 3676-3679 | 10.18           |                                    |
| L.monocytogenes EGD-e | LMO                   | 0550                  | 98                    | +                   | 0549-0552 | 10.31           |                                    |

|                           |     |       |          |   |                     |       |                                                                                                                                        |
|---------------------------|-----|-------|----------|---|---------------------|-------|----------------------------------------------------------------------------------------------------------------------------------------|
| L.innocua Clip 11262      | LIN | 0553  | 97       | + | 0552-0555           | 10.49 |                                                                                                                                        |
|                           |     | 0558  | 96       | + | 0557-0560           | 10.52 |                                                                                                                                        |
| E.faecalis V583           | EF  | 0340  | 133(122) | + | 0338-0340           | 10.2  | new start at nucleotide 2841213                                                                                                        |
|                           | EF  | 0998  | 112      | + | 0998-1003           | 4.84  |                                                                                                                                        |
|                           | EF  | 2913  | 122      | + | 2913,2287-2289      | 10.2  |                                                                                                                                        |
|                           | EF  | 3172  | 109      | + | 0403-0406,3172      | 11.54 |                                                                                                                                        |
|                           | EF  | 3203  | 129      | + | 2660-2666,3203      | 7.18  |                                                                                                                                        |
| L.lactis IL 1403          | LLX | 1220  | 111(105) | + | 1219-1223           | 8.5   | N-term has frameshift in SP,start at nucleotide 1219654 (ATG)                                                                          |
|                           | LLX | 1388  | 114      | + | 1385-1389           | 10.3  |                                                                                                                                        |
|                           | LLX | 1621  | 101(31)  | + | 1614-1621           | 9.93  | N-term with SP in other frame, start at nucleotide 1628183 (TTG)                                                                       |
| B.cereus ZK               | BCU | 0751  | 115      | + | 0750-0754           | 8.83  |                                                                                                                                        |
| L.lactis cremoris SK11    | LCR | 0709A | 106      | + | 0709-0710           |       | missed orf, start at nucleotide 28972(TTG) stop at nucleotide 29292<br>missed orf, start at nucleotide 639(ATG) stop at nucleotide 974 |
|                           | LCR | 1204A | 111      | + | 1204A-1207          |       |                                                                                                                                        |
|                           | LCR | 1445  | 99       | + | 1441-1445           | 9.84  |                                                                                                                                        |
| P.pentosaceus ATCC25745   | PPE | 0546  | 112      | + | 0545-0548           | 10.66 |                                                                                                                                        |
| E.faecium DO              | EFA | 3606  | 111      | + | 3601,3606,3594,4241 | 6.80  |                                                                                                                                        |
| L. mesenteroides ATCC8293 | LME | 0910A | 124      | + | 0909-0911           |       | missed orf, start at nucleotide 2029(ATG) stop at nucleotide 1640                                                                      |

|                           |     |       |     |   |           |       |                                                                  |
|---------------------------|-----|-------|-----|---|-----------|-------|------------------------------------------------------------------|
| L.casei ATCC334           | LCA | 0294  | 119 | + | 0293-0298 | 4.44  | missed orf, start at nucleotide 986(ATG) stop at nucleotide 1345 |
|                           | LCA | 0327A | 120 | + | 0327-0329 |       |                                                                  |
|                           | LCA | 0971  | 125 | + | 0970-0972 | 7.79  |                                                                  |
| B.thuringiensis ATCC35646 | BTH | 3760  | 105 | + | 3757-3761 | 10.68 |                                                                  |
| L.sakei 23K               | LSA | 0612  | 118 | + | 0610-0614 |       |                                                                  |
|                           |     | 1284  | 131 | + | 1283-1287 |       |                                                                  |

---
