# Supplementary material for: Lactobacillus plantarum gene clusters encoding putative cell-surface protein complexes for carbohydrate utilization are conserved in specific gram-positive bacteria
Source: PubMed Central journal article supplement (PMC1534035; doi:10.1186/1471-2164-7-126), 2006-05-24
Supplement: 1471-2164-7-126-S3.pdf [file 1471-2164-7-126-S3.pdf]

**Table 6. Order of genes in cell-surface clusters**

| <b>Complete genomes</b> | <b>cluster</b> | <b>csc gene order</b> |      |      |      |   |
|-------------------------|----------------|-----------------------|------|------|------|---|
| L.plantarum WCFS1       | I              | B(2)                  | A    | D    | B    |   |
|                         | II             | B                     | A    | C    |      |   |
|                         | III            | B                     | A    | D    | C    |   |
|                         | IV             | B                     | A    | D    | C    |   |
|                         | V              | C                     | D    | B    | A    |   |
|                         | VI             | C                     | B    | A    |      |   |
|                         | VII            | B                     | A    | B    |      |   |
|                         | VIII           | D                     | B(2) | A    | C    |   |
|                         | IX             | B                     | A    | D    | C    |   |
| L.monocytogenes EGD-e   | I              | C                     | D    | B    | A    |   |
|                         | II             | B                     | A    | C    |      |   |
| L.innocua Clip 11262    | I              | C                     | D    | B    | A    |   |
|                         | II             | C                     | D    | B    | A    |   |
|                         | III            | B                     | A    | C    |      |   |
| E.faecalis V583         | I              | B                     | A    | D    |      |   |
|                         | II             | B                     | A    | D    | B(2) |   |
|                         | III            | D                     | B(2) | C    | B    | A |
|                         | IV             | C                     | B    | A    |      |   |
|                         | V              | C                     | D    | B(2) | A    |   |
|                         | VI             | C                     | D    | B(3) | A    |   |
| B. anthracis A2012      | I              | B                     | A    | C    |      |   |
| L.lactis IL1403         | I              | C                     | D    | B    | A    |   |
|                         | II             | A                     | D    | B    | A    |   |
|                         | III            | D                     | B(4) | C    | A    |   |
| B.cereus ZK             | I              | C                     | D    | B(2) | A    |   |
| B.cereus ATCC10987      | I              | B                     | A    | C    |      |   |
| L.sakei 23K             | I              | C                     | A(2) | B    |      |   |
|                         | II             | C                     | A    | B    |      |   |

|      |   |      |   |   |
|------|---|------|---|---|
| III  | C | D    | B | A |
| IV   | B | A    | D | C |
| V    | C | A(2) | B |   |
| VI   | B | A    |   |   |
| VII  | B | A    |   |   |
| VIII | B | C    | A |   |

---

| <b>Incomplete genomes</b> | <b>cluster</b> | <b>csc gene order</b> |      |      |   |
|---------------------------|----------------|-----------------------|------|------|---|
| L.lactis cremoris SK11    | I              | A                     | B    | C    |   |
|                           | II             | C                     | A    |      |   |
|                           | III            | D                     | A    | B    | C |
|                           | IV             | D                     | B    | A    |   |
|                           | V              | D                     | B(4) |      |   |
| P.pentosaceus ATCC25745   | I              | B                     | A    | D    | C |
|                           | II             | B                     | A    |      |   |
| E.faecium DO              | I              | B                     | A    | D    | C |
|                           | II             | C                     | A    | B    |   |
|                           | III            | B                     | C    | A    |   |
| L.brevis ATCC367          | I              | B                     | C    |      |   |
| L.mesenteroides ATCC8293  | I              | C                     | D    | B    | A |
| L.casei ATCC334           | I              |                       | A(2) | B    |   |
|                           | II             | C                     | D    | B(2) | A |
|                           | III            | B                     | D    | B    | C |
|                           | IV             | A                     | D    | C    |   |
| B.thuringiensis ATCC35646 | I              | C                     | D    | B(2) | A |
| O.oeni PSU-1              | I              | B                     | A    |      |   |

---
