# Supplementary material for: Lactobacillus plantarum gene clusters encoding putative cell-surface protein complexes for carbohydrate utilization are conserved in specific gram-positive bacteria
Source: PubMed Central journal article supplement (PMC1534035; doi:10.1186/1471-2164-7-126), 2006-05-24
Supplement: 1471-2164-7-126-S4.pdf [file 1471-2164-7-126-S4.pdf]

**Table 7: Putative other domains in CscB and CscC proteins, in addition to WxL1 (in CscB) and WxL2 (in CscC).**

| protein      | WxL type | other domain code      | domain type/function <sup>a</sup>                   | HMM score <sup>b</sup> | start | stop |
|--------------|----------|------------------------|-----------------------------------------------------|------------------------|-------|------|
| EF1001       | WxL2     | SUPERFAM~49899~0021920 | Concanavalin A-like lectins/glucanases <sup>c</sup> | 2.8e-31                | 120   | 370  |
| EFA3340      | WxL2     | SUPERFAM~49899~0021920 | Concanavalin A-like lectins/glucanases              | 6.4e-30                | 91    | 342  |
| LBR0331      | WxL2     | SUPERFAM~49309~0021724 | Concanavalin A-like lectins/glucanases              | 7.4e-04                | 43    | 336  |
|              |          | SUPERFAM~49309~0021724 | Transglutaminase, two C-terminal domain             | 6.7e-06                | 482   | 576  |
| LBR0625      | WxL2     | SUPERFAM~49899~0024562 | Concanavalin A-like lectins/glucanases              | 2.0e-15                | 57    | 340  |
| LBR1027-1028 | WxL2     | SUPERFAM~0024184~49899 | Concanavalin A-like lectins/glucanases              | 1.7e-14                | 42    | 327  |
| LBR1269      | WxL2     | SUPERFAM~49899~0018963 | Concanavalin A-like lectins/glucanases              | 2.3e-04                | 38    | 322  |
|              |          | SUPERFAM~49384~0018753 | Carbohydrate-binding domain                         | 1.7e-04                | 435   | 526  |
| LCA0329      | WxL2     | SUPERFAM~49899~0024184 | Concanavalin A-like lectins/glucanases              | 5.3e-08                | 44    | 325  |
| LPL0297      | WxL2     | SUPERFAM~49309~0021724 | Concanavalin A-like lectins/glucanases              | 4.6e-06                | 53    | 288  |
| LPL3450      | WxL2     | SUPERFAM~49899~0024184 | Concanavalin A-like lectins/glucanases              | 2.6e-19                | 47    | 335  |
| LSA1820      | WxL2     | SUPERFAM~49899~0024184 | Concanavalin A-like lectins/glucanases              | 2.2e-19                | 32    | 284  |
|              |          |                        |                                                     |                        |       |      |
| EF0406       | WxL1     | SUPERFAM~52058~0021078 | L domain-like <sup>d</sup>                          | 7.1e-40                | 92    | 401  |
| EF0405       | WxL1     | SUPERFAM~52058~0022161 | L domain-like                                       | 8.7e-19                | 76    | 254  |
| LPL3075      | WxL2     | SUPERFAM~52058~0022972 | L domain-like                                       | 1.0e-19                | 155   | 528  |
| LPL3117      | WxL2     | SUPERFAM~52058~0023073 | L domain-like                                       | 7.5e-19                | 105   | 490  |
|              |          |                        |                                                     |                        |       |      |
| LPL2975      | WxL2     | SUPERFAM~81296~0017693 | E set domains = "Early" Ig-like fold families       | 7.2e-04                | 178   | 262  |
| LPL3064      | WxL2     | SUPERFAM~56601~0016598 | beta-lactamase/transpeptidase-like                  | 3.2e-03                | 1     | 124  |
| LPL3676      | WxL2     | SUPERFAM~54358~0021100 | Immunoglobulin-binding domains                      | 2.7e-03                | 249   | 313  |
|              |          |                        |                                                     |                        |       |      |
| LMO0587      | WxL2     | SUPERFAM~51126~0019984 | Pectin lyase-like <sup>c</sup>                      | 5.4e-05                | 1     | 279  |
|              |          | SUPERFAM~52047~0024268 | RNI-like <sup>d</sup>                               | 8.4e-08                | 134   | 234  |
|              |          | SUPERFAM~49401~0016614 | Bacterial adhesins                                  | 1.0e-13                | 233   | 374  |
|              |          | SUPERFAM~53850~0023866 | Periplasmic binding protein-like II                 | 2.6e-04                | 476   | 538  |
| LIN0595      | WxL2     | SUPERFAM~51126~0019984 | Pectin lyase-like                                   | 1.2e-05                | 1     | 279  |

|              |      |                        |                                              |         |      |      |
|--------------|------|------------------------|----------------------------------------------|---------|------|------|
|              |      | SUPERFAM~49401~0016614 | Bacterial adhesins                           | 5.1e-16 | 233  | 374  |
| LCA0293      | WxL2 | SUPERFAM~51126~0021375 | Pectin lyase-like                            | 2.0e-04 | 131  | 261  |
|              |      |                        |                                              |         |      |      |
| LMO0549      | WxL2 | SUPERFAM~52047~0024268 | RNI-like                                     | 4.3e-17 | 128  | 276  |
| LIN0552      | WxL2 | SUPERFAM~52058~0019210 | L domain-like                                | 2.2e-14 | 142  | 296  |
|              |      | PFAM~Big_3             | Bacterial Ig-like domain (group 3)           | 7.9e-03 | 479  | 548  |
| LSA0211-0212 | WxL2 | PFAM~DUF285            | Mycoplasma protein of unknown function, DUF2 | 5.4e-06 | 324  | 480  |
|              |      | SUPERFAM~52058~0022972 | L domain-like                                | 1.9e-12 | 282  | 565  |
| LSA1730-1731 | WxL2 | SUPERFAM~49401~0016614 | Bacterial adhesins                           | 5.7e-06 | 91   | 147  |
|              |      | SUPERFAM~49373~0017678 | Invasin/intimin cell-adhesion fragments      | 2.4e-05 | 1609 | 1685 |
|              |      | PFAM~Fil_haemagg       | Haemagglutinin repeat                        | 2.8e-05 | 1255 | 1319 |
| LPL2173      | WxL2 | SUPERFAM~48726~0018866 | Immunoglobulin                               | 5.2e-09 | 49   | 152  |
|              |      | SUPERFAM~49373~0018812 | Invasin/intimin cell-adhesion fragments      | 6.6e-12 | 145  | 246  |
| LBR0959      | WxL2 | SUPERFAM~49373~0018812 | Invasin/intimin cell-adhesion fragments      | 2.2e-03 | 77   | 169  |
| LLX1219      | WxL2 | PFAM~Big_3             | Bacterial Ig-like domain (group 3)           | 3.2e-23 | 470  | 536  |
| BAT7092      | WxL2 | SUPERFAM~49265~0021408 | Fibronectin type III                         | 3.5e-04 | 362  | 418  |
| LLX1616      | WxL2 | SUPERFAM~51110~0017993 | alpha-D-mannose-specific plant lectins       | 6.4e-03 | 984  | 1102 |

<sup>a</sup> Low-scoring irrelevant domains removed (e.g. Chlamydia polymorphic membrane protein)

<sup>b</sup> Minimal e-score: 0.01

<sup>c</sup> Concanavalin A-like lectins/glucanases and pectin lyase are similar domains

<sup>d</sup> L domain-like & RNI-like are similar domains
