# Supplementary material for: Lactobacillus plantarum gene clusters encoding putative cell-surface protein complexes for carbohydrate utilization are conserved in specific gram-positive bacteria
Source: PubMed Central journal article supplement (PMC1534035; doi:10.1186/1471-2164-7-126), 2006-05-24
Supplement: 1471-2164-7-126-S5.pdf [file 1471-2164-7-126-S5.pdf]

|      |        |      |        |      |        |
|------|--------|------|--------|------|--------|
| 3073 | Q88TA5 | 2027 | Q82ZB1 | 1725 | Q38UV1 |
| 3074 | Q88TA4 | 2028 | Q82ZB2 | 1727 | Q38UU9 |
| 3075 | Q88TA3 | 2029 | Q82ZB3 | 1728 | Q38UU8 |
|      |        |      |        | 1729 | Q38UU7 |
| 3115 | Q88T69 | 2238 | Q836A2 | 1730 | Q38UU6 |
| 3116 | Q88T68 |      |        | 1731 | Q38UU5 |
| 3117 | Q88T67 | 2287 | Q830T7 |      |        |
|      |        | 2288 | Q830T8 | 1810 | Q38UL7 |
| 3412 | Q88SK2 | 2289 | Q830T9 | 1811 | Q38UL6 |
| 3413 | Q88SK1 | 2913 | Q830T6 |      |        |
| 3414 | Q88SK0 |      |        | 1815 | Q38UL2 |
|      |        | 2660 | Q82Z82 | 1816 | Q38UL1 |
| 3450 | Q88SH3 | 2661 | Q82Z84 |      |        |
| 3451 | Q88SH2 | 2662 | Q82Z85 | 1818 | Q38UK9 |
| 3452 | Q88SH1 | 2663 | Q82Z86 | 1819 | Q38UK8 |
| 3453 | Q88SH0 | 2664 | Q82Z87 | 1820 | Q38UK7 |
| 3454 | Q88SG9 | 3203 | Q82Z83 | 1821 | Q38UK6 |
| 3676 | Q88RY0 |      |        |      |        |
| 3677 | Q88RX9 |      |        |      |        |
| 3678 | Q88RX8 |      |        |      |        |
| 3679 | Q88RY7 |      |        |      |        |
