# Supplementary material for: Lactobacillus plantarum gene clusters encoding putative cell-surface protein complexes for carbohydrate utilization are conserved in specific gram-positive bacteria
Source: PubMed Central journal article supplement (PMC1534035; doi:10.1186/1471-2164-7-126), 2006-05-24
Supplement: 1471-2164-7-126-S7.pdf [file 1471-2164-7-126-S7.pdf]

BAT07090 ---MRF SKVMIPTLALIALGMSLI ---GTPASAAATTADT---KLNQSIIT---GGEHNIITVTP---VSNF 54  
BCEA0046 ---MRS SKVMIPTLALIALGMSLI ---STPASAAATTADT---KLNQSIIT---GGEHNIATVTP---VSNF 54  
LSA1815 ---LNKLVKMLTSSAALMGV ---VGLS ---QITPVHAADTFA---KSVGTLEKX ---DGTQILTSDV---SLNF 57  
EF00405 ---INTSSKQASNIYSEINLPVGLIQDQNSIINKGNVAIT ---NDLNGTNNLGA ---DSNQTIKTET ---IV---SGNSGELEENKGV ---NVEDHGARVTSSTNQVKIIDEQDKRAEETDELEISVPOSFKY 121  
EF00406 ---TNSSSKSAENYVSDITLPEGLKIDKNSVKNNLVPVSV ---DDINGMNLGLT ---SSNETVTFKRT ---IV---SGPDKLELMKGV ---TWEDNGIRTVNSSNKVKIIDEQDKRGNQNDLEISVPPVGRY 121  
EF02238 ---MKQNLTLVQSLVALLV ---SLRS ---DPPSVSARTRS ---KTPVSVLEIEGGPGDES ---VDDAIDP ---DLENP ---NTS---DLLRIPKEFTM 80  
EF00338 ---MKKTLVTLVAGTALLGA ---SLA ---PAAAHAATTG ---TTPANVEMTSGS ---LPGGTGGDDGSTQE ---PEFGS ---NTMNDLLVPEKFK 78  
EF02027 ---MKKKMMASLVVGSAAVAA ---SLA ---PLSAQAATTG ---NTPVQVEGGGT ---D---NETG ---NAGNTIAP ---DPTVNTNMDLVKIPKAVTF 78  
EF02028 ---MKKKMMASLVVGSAAVAA ---SLA ---PLSAQAATTG ---NTPVTAEEAGGTLPDNG ---VNTVDF ---DFTKH ---NSNMDLLRIPREYDF 78  
EF02029 ---MKKKMMASLVVGSAAVAA ---SLA ---PLSAQAATTG ---NTPVTAEEAGGTLPDNG ---DANTVDF ---DFSGS ---NSNMDLLRIPREYDF 76  
LSA0611 ---MKKTMISTLLESLAATT ---LISAG ---QIQAAPEVEKQ ---TDAADVTEKS --- --- ---NPLVITAVP---DFHF 60  
LSA1811 ---MKQTKFALLAAVTLASAT ---LINVA ---GVAATVSDKVAIK ---ATPAKATTAET --- --- ---TVKAGQLTDAAP---DFHF 66  
LCA00327 --- ---MTLAGVMLPIT ---SVFAADEPIKX ---TSVGEVRVG ---VDFDNE ---DENNEFDNE ---DGS ---KDLISLVKVP---DLKF 62  
LCA00328 ---MKKLVTNATAAVTLMIA ---GVGFP ---QOSVMAADDLGPX ---KSSAQLTVD --- --- ---AGNIMIQQVP---DLNF 59  
lp 2175 ---MRTFKLNTGLSGGATLLS ---HALM ---PLAAALAGPGT ---ASNNLTVSSGYVADSTG ---NAEALS ---NAQITVME ---GELTLDVAV---NIAA 78  
OE1275 ---MKKISKLAPLSLALSLGLV ---ALVSP ---ISSAADITGSS ---TTSVGVIT --- --- ---AGSLSDSTF---DLAF 59  
LLX01221 ---MKRTTWTATTALLTMLGG ---HFLAQ ---GVAHADSTT ---MNATISVT --- --- ---SGGNIDPLA---SIDF 55  
LCA00269 ---MKTKMTSALVAGATLLAG ---AIAAP ---AATQAATVQGN ---GVNGQALPQDA --- --- ---KTAGISFG ---QLPPTGNVGLRLOVMPKILDF 80  
LSA0177 ---MKTKITLSAALTAGTLLSIL --- ---APTATTAATAE ---DANANGTELPMSD ---NTEVGISG ---DNTDNGNTGVLRLQVMPHDF 77  
LSA1821 ---MKITSLLSGLVTVAGAA ---MISGQ ---TAAADAPKNEI ---ATDQKQVTSV --- --- ---VMAKLTGSDTVKLTAVP---DLDF 66  
LSA1287 ---MKTKLQSVVAALVAPA ---AMTIG ---SASADAVTPQ ---TSADTVVAK --- --- ---ENGLTVLKSVP---SNF 67  
LBR00624 ---MQQ ---TPTPKALRIVASTCLV ---SLIAL ---PTVSAADVQKQ ---ATSATVAAA --- --- ---DAVPTLDTVP---NLD 62  
EF00403 ---MKKNLVGVVSSVALVGI ---AAG ---GGNVQATVDSA ---STDIGICSG --- --- ---HGGPT---TPGPDIQVAPIGLD 65  
PPE00558 ---MKRILSAMI CCGMLLVG ---ANSGV ---AHAADKLTGMT ---TATATVT --- --- ---KGDVTLIDS---AINF 55  
lp 3453 ---MKKILGLTVAGMTLMAGL --- ---PLVQAAADTET ---TTKAEVELIQDD --- --- ---TKNDITLDQAP---GVSP 56  
lp 3452 ---MKGLLVTVGRLLMTVIGCL ---LISN ---GNFATQAAT ---QSQVQVEMTPSD ---DDN---AVSPVDFD ---DFSXF---F---GDPVDFD ---NVAAGTSRGLTIDVVS---NLKF 93  
lp 3067 ---MKSMGLLLMAGTLLAG --- ---STPIVANAENKSGNTDKAEKST --- ---STVTFP ---DPSNPDVSPDGD ---GNGAAAGGLSLIVKSLGY 85  
lp 2978 ---MKKVVGLLMTSTLLGA ---LT ---PLVGHVADGNNKSGTINATF ---EANT ---TNPVDFV ---PLVGHVADGNNKSLIAPGKLD 90  
lp 3679 ---LLVRVSKLVSGLLVASSLIVSGVI ---AQADT ---PAAPNADSTANTGTDTQAMPEGNS ---SPVSPV ---NFDNFKEDNSGD ---SGNGAAGGGLSLIVSNKLD 97  
lp 3412 ---VVNANGTSLNLTGLSLKGD ---KILIVMADSLGN ---EDPNSVPGQOQ --- ---DAPQAPITVAADLVNPFDFD ---DFSXF ---GTGGTNNLGPLSLDAVPTLNF 99  
lp 3414 ---MKSRITLKAAMLVSVASIT ---ACLS ---NNLGSADITLPTSGKQADVSP ---TSGNG ---GSTNVPDF---DNPDPN ---GGGGTNNGPLSLDAVPTLNF 85  
lp 1446 ---SNGNATATAASDGSMSIA ---MEATKXANDVITQIV ---KDSAGNENPVTS ---TTVHDATFAAATQ ---TVAP ---AIGPTAPT ---EFEHPGTT---NTSGS ---ENTGTGNTEGRLDAPSQENF 108  
lp 1449 ---MNRRLCLSTGALGLMAT --- ---SITATGA ---TTNGTVTQDDTS --- ---ATAPVDT ---SENVLIT---TDP ---NMPANNNTGTLTDVAPKIDF 80  
lp 1450 ---MKKTVLITATMLLSLGM --- ---AVMATADSTA ---NTTNLEITENT ---GPTLPVDFPTNA ---NFQVEEDP ---DNPATGNTGALLTDVAPRTDF 82  
LIN00559 ---MKRKTKVISTSLALGLI ---VTPVLS ---EDHASAATVKN ---DTKTIKDKST ---TF---TEPITF ---DPTET---DP---VVP---SF ---DNPPVSSDGLMILA---IS---NMF 90  
LIN00554 ---MTRSTVKTASLALGLI ---VAPVLS ---GDHASAATSVIQ ---DSKGIKDKSA ---TP---DPVDFD ---DPTDF---DP---VVP---NP ---TDPVGS DGLMILA---VS---NMF 90  
LMO00551 ---MTRSTVKTASLALGLI ---VAPVLS ---GDHASAATSVIK ---DSKGIKDKST ---TP---DPVDFD ---DPTDF---DP---VVP---DP ---TDPVGS DGLMILA---VS---DMD 90  
EFA04241 ---MKNNMIGTLLSLTLG --- ---GLATPAEAGQA ---TSKGITTEPT ---N---TVEPLNPT ---DPSKP---ADP ---ENPATGQSLTLDVVP---ELFP 82  
LIN00593 ---MKKTLVGLIGITVSLV --- ---LAPSAVAVSSG ---DSKASIKKAGT ---G---VVNVDPE ---DPTKPID---LPSNE ---TDPGTGNTGSLTMDVVS---SVNF 87  
LMO00585 ---MKKTLVGLIGISSVTF --- ---LAPSAVAVSSG ---DSKATVKKAGT ---G---VVNVDPE ---DPTKPID---LPSNE ---TDPGTGNTGSLTMDVVS---SVNF 87  
LSA1725 ---MKTKLTSSVLAGATLLSIL ---APTAT ---AATNETGSQDAAS ---NDNGGTLKLPQD ---KT---VAG ---ISGDN ---SDNGN---TGVLRLQVMPHLD 82  
LSA0215 ---MKTKLTSTVLTASTLLAL ---APATL ---ASAATPKDDA ---AANGGTLKLPD --- --- ---DITDAGISGDT ---HDNGN---SGVLRLQVMPHLD 78  
LCR01205 ---MKRITLSLSTAVISTAL ---HATN ---LLEVSAATVGNM ---SAGNVAQPKK --- ---TPTNPVSPG ---DGKTPITP---TTPGVPN ---TSTPVASDDGLTLDVVP---TLNF 91  
LLX01387 ---MKKTLVSLSGVAVITATL ---LSTS ---VLEVSAASVSGT ---TSGNVAQPKK --- ---TPTNPVSPG ---DGKTPITP---TTPGVPN ---TSTPVASDDGLTLDVVP---AINF 91  
LCR01441 ---MKSQVTKVI---SLATLGLL ---AASVT ---POLASAAATTSV ---GTQGEVTFAGT ---D---TTGNVDFQ ---DPTVPK---TEPDGVN ---PVGPTMPDSSLTIVAS---SEDF 91  
LLX01617 ---MKSQVTKVLSLAT---LGLL ---AVSVT ---POLASAAATTSQ ---GTQGEVTFAGT ---D---TTGNVDFQ ---DPTVPK---TEPDGVN ---PVGPTMPDSSLTIVAS---SEDF 91  
LCR00180 ---MKKATLSAATLALVAG ---ASGVS ---GWSAAVKAEN ---SSTGIGFRANT ---TTPP ---DITNPELKB ---GHGGT---PGALALDAS---NLTF 82  
LCR00710 ---EKTLSLSAATLALLVVG ---ATAIS ---TASADSVDEQA ---TSTGTIGTANT ---TTPDFV ---NPEVPEP ---GPGGTAGALALDAS---DLDF 81  
LCR01444 ---MKKTLKSTLLAGVLS ---APMII ---TTASAATGGD ---TSSANLTLQAGT ---G---SVDFDPT ---DPTNPVTP---VDP ---GTPGA---SGNLTVDGSS---TLVF 86  
LLX01620 ---MKKTLKSTLLAGLILS ---APMII ---TTASAATGGD ---TSSANLTLQAGT ---G---PVPDFPT ---DPTNPVTP---VDP ---GTPGA---SGNLTVDGSS---TLVF 86  
LCR01443 ---MKNLLKSTVLLTALIV ---GPIIV ---SEADAATGGD ---TSNGVNAEAGD ---NT---GINPVDPL ---DPSVPEGE---TNPDGT ---PTPGT---GGALSIDAS---SLSF 91  
LLX01619 ---MKNLLKSTVLLTALIV ---GPIIA ---SEADAATGGD ---TSNGVNAEAGT ---LL---ELTFLTL ---DPSVPEGE---TNPDGT ---PTPGT---GGALSIDAS---SLSF 91  
lp 3116 ---MKKVVGLMISAGLIGAT --- ---TVVANADITG ---SSTGDVIT --- --- ---GGTSMVDATHLAF 52  
PPE00548 ---MKNMMLTIAIGVAIN --- ---TNTAMASQISEV ---TNEHDVITAGS ---GX---DVFPVDFD ---DITD ---DSDGTGDMGSLTIFAS---NITF 76  
EFA03975 ---MKRTIASLTVAGSLLC --- ---IQSVFAENKSSA ---TTEGTVKPDAAANPE ---VVPVPPVDFN ---DEPTFTE ---DEPNQGTSGLLTIDQAP---DLDF 87  
lp 3073 ---MKRLLGLLISAAIATS --- ---GITASAADITPQ ---TSNGTVGTTGGD --- --- ---ITDNGDITLAGAS---LDF 58  
LME00910 ---MKKTLGAGLGLAATT ---APLA ---NKKLGLGAGLGLAATT ---QSNAAQSVIK---D---ET---TKPVNLNPNVAD ---GGQNSVTP---LDNVTKDX ---PQAGT---SGLTIDTAS---SNF 98  
EF01893 ---MKKLVRISSLLVATPLM ---LINS ---KVEAAQVASI ---QSNADITFADN ---T---VTPPVNPT ---NPSQVTP---NPADP ---QPGT---AGLSIDVVS---NIF 86  
EF02288 ---MKMTLASSLLIATVAG --- ---TLPVQAEVANN ---DIDAIVKKADEKDNS ---KNPVDFEDKDG ---VDEGS ---TGPITLDAS---SLNF 87  
LCR01442 ---MKKIRLISPLILMTLGL --- ---ELRVNAEVSQ ---NSQGI VGP GGS ---G---IQPPVNFKE ---DPTLPVPE---QNPDGSK ---ENFGG---NGSLTIDAS---SEDF 87  
LLX01618 ---VKKIRLISPLILMTLGL --- ---ELRVNAEVSQ ---NSQGI VGP GGS ---G---VQPPVNFKE ---DPTLPVPE---QNPDGSK ---FNPGG---NGSLTIDAS---SEDF 87  
LCA00295 ---MKKSVLVASAGLTLGL --- ---SSMPVSMVGAETE ---VSDQVMPKRDV ---TRTPAKNPLDP ---GDKPKGE---TNPTNPT ---GTATNGTGPISLDAS---SFT 91  
BCU00753 ---MKRRNMLTKALAGAVLSTAL ---AGST ---SVLAAEQDGGTL ---NSKAIKFEKNT ---D---PVPNISPI ---NPDEVPEVNPDPDDV ---HEKGT---DGPSIDVVS---NENF 97  
BTH03758 ---MKIKVTKMLAKALGAVLSSV ---SVGT ---SAAAEKDGKV ---DSKAIKFEKNT ---D---KIDVNFPE ---NDETVDF---VDP ---DKKGT---DGPSIDVVS---NENF 92  
BCU00752 ---MKTKIALAGAVSVAVA --- ---GAPTAEAGAK ---NSLDDVTFENS ---E---VTKPINFIDSEEVTTTGN ---DPKPKDP---KNPDEEDNEDNN ---EDGT---CGPSIDVVS---NENF 106  
BTH03759 ---MKLALALGAVSLSVAVA --- ---GTSALAEKANN ---KSKDDVTFEDT --- ---STDPNNE ---NFENEKVP---ENP ---GHEIGTKGPSINVS---NLHF 85  
EF02661 ---MKKIVLAVVGVGSGVL --- ---AIQQAEDINVM ---TSNGAITREDT --- ---DPTKPNPT ---NFDEKVEP---EDPTDF ---TGPKPGTAGPSIDAS---SDF 88  
EF00999 ---MKRVLVTSATILVGVG ---QA ---NASAAETPREM ---NTEGTTREAGD ---NE---ITPPVDFENF ---DPTKPVDF---DPP ---PGPT---GGALSIDGSS---KRF 87  
A03344 3344A ---MKKEIIVTAAAMLFMSV ---ASTT ---VSAETEPRK ---NTEGTTREAGD ---EG---VTPVDFENF ---DNKPVDF---SDP ---DPTKPVDF---DPP ---PSPT---GGALSIDGSS---KRF 88  
EF02287 ---MKKILATIPATLGVAT --- ---APEVNAEKN ---ESNAILTEPDA ---SINKPVDFVNE ---DTEKVEP---DPTTDFG ---NPNEGTTCGPSIDAS---SLDF 90  
LCA00296 ---MKKVLVAAAAMGTMAV ---NAT ---TVLAAQTNGGV ---STNGSIEKPTIE ---K---VTKPVDPL ---DPTKPVDF---DAEDPKKV ---VQGT---CGPSIDVVS---SNF 90  
EF01002 ---MKKVTVCSTLIL ---GSLGM ---TSQAAEADGSS ---TSNGI VEPSE ---E---PTNVPDPT ---DPTNPVDF---DPTDFEG ---ENPGT---NGPSIDAS---SLDF 87  
EF02663 ---MKKIKVDMATTILGAL ---ALV ---PMSALADGGGE ---QTNGAIQAPNT ---N---PTNVPDPTNE ---DPTKPVDF---DPTDFEG ---ENPGT---AGPSIDAS---SLSF 91  
EF01000 ---MKKQVGVIVLCSTAVAGV --- ---SIQAAREPRE ---KSNGLVETPNV --- ---DPTKPVDF ---DPTKPVDF---DPTDFEG ---EGPNPGTQGPSIDAS---SDF 89  
EF02662 ---MKRIVVSLGTMLLG --- ---ATVPEAATVVE ---DSEQSVITPST ---D---GTPVNFENF ---DPTKPVDF---DPTDFEG ---ENPGT---PGPSIDAS---SLDF 87

BAT07090 NAV TISGETQ --- VTE --- ANPGVLTIDATG SG -- N --- GNRINVKADQKVSVD --- TKSNTT LPKGSLV 112  
BCEA0046 NAV TISGETQ --- VTE --- ANPGVLTIDATG SG -- N --- GNRINVKADQKVSVD --- AKSNTT LPKGSLV 112  
LSA1815 GDV --- ANANGMTDLK --- GTEATVEDTTF SQ -- T --- ATTSIGQDSDVAELT --- INGQLL- 110  
EF00405 GIL-NKSNVEQ --- LILNINNNQNTSVV --- TDGFVTRMRDERP SQ -- S --- GKMLTAQLSDRFDVFN --- STVLT NSGIALK 191  
EF00406 GIL-NKSNVPO --- FHLNARNQTHNVV --- TDGFFTRLRDRPT KD -- N --- GKMLTAQLSDRSDFTN --- STVLT NSGIALK 191  
EF02238 ETQ-AISGDLT --- AVPIRPEGNT --- HTMRFPGMGVRG AT -- T --- GHVVTAEIPHMNEAHSLL --- GITTQ LTGSSAR 149  
EF00338 AST-EVSSDLS --- APLSDATG --- TQTKRYAVGDVVRG TQ -- A --- GNSVTAGVAEMKNGTATLE --- GSITFA QTVGAVAK 144  
EF02027 NTT-KISDSLQ --- NISSTQCVLG --- --- VAGDTRG TK -- E --- GHVVTASATLANGSEA --- LAGNINFS QICYSK 140  
EF02028 GKX-SISDDLIT --- KPIPNKIDEGRA --- GNVESGATVGDTRG SK -- E --- GHVVTQAQSTGKMLGEE --- SLEGST TTGAMFL 143  
EF02029 GKX-SISDDLIT --- KPLINQNDPEATN --- GTEMIIGVGDVVRG GK -- E --- GHMLTAQSNGLKLGTESIQG NIKVAL ITQDIE 148  
LSA0611 GSH-EIDRSAD --- KDLAAWESGSHGTANT --- ATSNVVSQDDRSQAKL --- D --- GDLQVAQTDANAGTTDASDASDV --- LTGVNTW 140  
LSA1811 GND-DTTNNLNKNDLLEQTSNNVSTHHNDGHAQTATPADGTQGNID --- KDVNMLQVSDVRG AG -- S --- EMTLAQEGEKNLDT --- KSEGTATGVIT 155  
LCA00327 KSV-SVEQLAT --- GQOTLPLTNTVTDPVKNEPAGNASDG --- NNQGLNLTIDVRG NG -- A --- GKMLEAQAGELKNAAG --- QK LAGSLLL 141  
LCA00328 GGI-SVEELVS --- GSRQRHPLKSNLVNPGPIKATANANG --- NATGLLOADVRG TG -- A --- GWRLEAKMDALTDGKCHL --- LAGVVD LVGSOLT 143  
lp 2175 SST-NVKNLVS --- AAATLNATSSNTSGSGVDG --- NGSGLNVSDVRG NH -- A --- GNTLVGMGPFSSGAA --- K VDSATLN 148  
O0E1275 TSL-GVGLIAN --- ATSTVNSPL --- TDAGNIVTDDTG SG -- D --- GSLAAGVTDLNGDN --- T LDVSSLT 118  
LLX01221 NAL-TLNGQAO --- TSTPK --- TTGVALNLDVRG ST -- T --- GYLQANKKDATLGG --- --- GMTLK 107  
LCA00269 GNEQFSDVP --- VFTADQONAGRADNTRYPVSKSGNTLTAVALNTDDTALANV --- KGMATTVVDKRT TR --- DABN --- AEDKTGQDSDAGD TLSVADGPFSLDDNG --- ADTGKT IDNATIT 197  
LSA0177 GNETFLSQVP --- TFDATGHNVSIDNDRHASVKNTDNTMTALNTDDAKLSEV --- KGMATVVDKRT TR --- ENND --- PEGETAKTKQSGT QLVKSDDLVLTAK --- NGBTINNAL 188  
LSA1821 GTX-EITASVI --- DLGQ --- TADGTVSVADARG TG -- A --- GTVVVALTTPPTDAS --- SHT LENSTLT 122  
LSA1287 GTI-EASDLVA --- GNGKKA --- QADGTLEVSDFRL GA -- S --- DTLTADMGQADNDN --- Q LINGSTLN 124  
LBR00624 GENSTFNQSG --- RYSAT --- TDDQLQVWNPGL TS --- --- GAVQLKSGATDQLG --- DT LGAVLS 118  
EF00403 SNSNVNTTAV --- QAPETT --- GTNKVIVSEKRSNEPT --- K --- ESLTAQLSDLTNAGG --- SET LTGAGLK 127  
PPE00558 DPQ-PLSGDYN --- FGSQDWN --- --- K --- GLSARLGDTDATRT --- VKIGDAT 106  
lp 3453 GTE-KITNDSK --- TUDAK --- NVTGLKVTNPGN TD --- --- GVLVVKSGKKNMADD --- TRE LRGAAIT 112  
lp 3452 N---ALTTAGG --- PPKTTAK --- NEWAMIQITDRRA TA -- A --- GMLQVTPSGVQSQO --- TLTTSLK 147  
lp 3067 GTH-ELDVLND --- QQYKVDPTSSITLLV --- QDKMVEVSDVRG TN -- A --- GKMLVTGSNLTGTDG --- TAAKGATLS 151  
lp 2978 GSH-EIDVINN --- QSYKALGSDGSTVTMGS --- TSKVLAQVSDVRG TN -- A --- ST LKCATVS 159  
lp 3679 GSH-EIDVLNF --- EYTYAETDSDLSGLL --- NKKAITEVSDVRG SN -- A --- GMLVAGSSLTGTDG --- SV MKGATHQ 164  
lp 3412 GQH-SIPMDT --- AVPLLSFSAEDQLATADGKVAIVGGQKNG --- QDSVITQVTDTRD TP -- S --- GMLTAQLSALTATDG --- TT MTGSVVT 182  
lp 3414 GTH-TQPNVD --- AVTLLSKDASQESLATAANDKTKQNVTTSGKKNK --- NDIITQVSDSRG TG -- A --- GMLTAQLSDLTASDG --- QV LTNASVV 169  
lp 1446 GSV-TTSMQPK --- TVAAQTLNG --- VAKOLOVSDNRL AT -- H --- GMLTARQNSPFTSTS --- GAQ LTGAKLH 169  
lp 1449 GTV-TTSNAAK --- TVYTAIG --- NINQLOVSDKRT TA -- N --- GMLVNVKQDRILTNAS --- NNEVLTGAVIH 139  
lp 1450 GSV-QTAAEH --- TVYKATTT --- NGQQLQVTDNRGTDQ --- --- GMLTVVEQDDLTETS --- GSSPHV LTGTTIH 146  
LIN00559 GTQ-SVSAISSGALNTHAEDDLSTYDITNGQQDLPGEASVSK --- KVTPLAQSDLRG TN -- T --- GMLSVTASEKDSST --- PAKK IQGAQLT 177  
LIN00554 GTL-DSELSKGANNAHAKDKITTEDTNGNQDLPGEVSVTK --- DVTPLAQVSDVRG SN -- N --- GMLSVTGSEKDSST --- PAKK IAGAEIT 177  
LMO00551 GTH-NVSSLSGALNVHAADDTISTYDANGNQDLPGEVSVTK --- KVTPLAQVSDVRG TN -- T --- GMLSVTGSARKDSST --- PAKT IPGAELT 177  
EFA04241 GTH-EIESGTR --- TVQVASK --- NNDTPVQVSDRRG VGADGQA --- QGNVTVSVSDRVNGSQV --- LQGAELD 145  
LIN00593 GEX-EVSTTEQ --- SVSST --- SRKPLQVSDRRG TG -- A --- GKVKVATATAKDEDG --- AAS LSGAKLS 144  
LMO00585 GEX-EVSTTEQ --- SVSST --- SRKPLQVSDRRG TG -- A --- GKVKVATATAKONEDG --- AAS LSGATLS 144  
LSA1725 GNE-KILDDSK --- LDFADGKNLSPINNLKASMEGKINETAVALNTNDELKKGVDGTAATVVDKQV --- TRDSSNANTINPNNAIDPESD --- EGTTSAKGLSVKSDPITANDNADPSKPTTET --- ITGAKLS 216  
LSA0215 GNAKIDAAET --- NEDATGANLGVVGNDRHASVDOQDSNKTETLTTSDANLKA --- QGTAVTVVDKQV TR --- ADG --- MDAATQKAGD DLKVSIAEPLKTTT --- GQE IDGANLL 186  
LCR01205 GTH-KVDASSP --- HWSANAANDGSGK --- AITPQVQVTDNRGTATG --- PT --- GMSVLTQTAQKKGTK --- AGD LTNAVIT 160  
LLX01387 GTHVVDASTA --- TWSANAANDGSGK --- AITPQVQVTDNRGTATG --- PT --- GMSVLTQTAQKKGTK --- AGD LTNAVMT 160  
LCR01441 GSH-PVSNKAE --- VVNAAAQKDDNT --- TRTNVQVADNRG TF -- S --- TRTNVQVADNRG TF -- S --- GMLVQVMTDFTADSNLV --- ANGHGT LTGATVT 162  
LLX01617 GSH-PVSNKAE --- VVNAAAQKDDNT --- TRTNVQVADNRG TF -- S --- GMLVQVMTDFTADSNLV --- ANGHGT LTGATVT 162  
LCR00180 DQH-EISATSE --- TYFAADTTASK --- PVGEVEHMDLRG LGSSGGNN --- --- GTQLTVKQNDQKNDK --- GAE LKATLR 151  
LCR00710 GTH-EISASQA --- TYFASADSWASK --- PVGAVQVMDLRGLTG --- N --- GTTLIVTQLAQTNGS --- --- KG LTGAALS 147  
LCR01444 GTQ-SISTQSK --- TYVAHPDMVQDSNAVK --- VVPNVAQVTDQSG EL -- S --- GMLSLTQASDLHMTTGTTS --- TEPGVA LSGAQTS 161  
LLX01620 GTQ-SISTQSK --- TYVAHPDMVQDSNAVK --- VVPNVAQVTDQSG EL -- S --- GMLSLTQASDLHMTT --- GTSTDPGVA LSGAQTS 161  
LCR01443 GTQ-KISSNDA --- TYVAHAQVTSKDDGSAVDM --- TRPNVQVTDTRG TW -- D --- GMLTVAESDQONAS --- GDK LTGAELS 163  
LLX01619 GTQ-KISSKDA --- TYVAHAQVTSKDDGSAVDM --- TRPNVQVTDTRG TW -- D --- GMLTVAESDQONAS --- GDK LTGAELS 163  
lp 3116 GSN-TISSSDA --- TLAAT --- SSTPTVTVSDLRG TS -- A --- GMLTVAQQQNTAL --- NGTSSS LTNAAIT 111  
PPE00548 GEX-EIKQADA --- NTVAA --- NQKPFVQVNDTRG GA -- K --- GMLGVALTFVVGANG --- --- KE LVGAQMS 132  
EFA03975 GTI-KLGAAT --- VVAALQSGTDSSTGAQT --- QVQNFVQVTDKSG N -- A --- GKLSVKRTEIGTTS --- --- DTNK LTGSKVK 156  
lp 3073 GTN-QITAAAT --- DDNDNT --- NKSAAVSVVDRG TA -- A --- GDLRVKQNDVKNDK --- AVANKE LTGAILT 120  
LME00910 GTNLISSAQ --- TVYASAQSNKGTMT --- TGPNTAQVTDNRSGDKH --- T --- DSSSLTGATTS 171  
EF01893 GSK-QLQAGTA --- LYSAQDQVQNSSTGDLN --- SVPNVQVTDKRG LN -- L --- GKMLSVKSAQKATSD --- STPAVLNNASLT 157  
EF02288 GEN-LISTKDE --- LYSAQVLDKNNVEX --- TGPLAQVTDNRG TL -- E --- GMLSAKQNSATSAT --- KGQT LEGTEIV 164  
LCR01442 GNE-KISNKDQ --- TYLAKAQKVDSEV --- LTPNVQVTDKRG TF -- A --- GMLKVVETQVTDQSDG --- FQKVKV LIGAMLN 158  
LLX01618 GNE-KISNKDQ --- TYLAKAQKVDSEV --- LTPNVQVTDKRG TF -- A --- GMLKVVETQVTDQSDG --- SGPOKVKLKGATIN 158  
LCA00295 GEA-MISADDA --- KYVAKPQVVSQDDGRTV --- DRPNVQVTDKRG TE -- E --- DDTKE LTGAQLK 162  
BCU00753 ETQ-KASGNNE --- LYVAKLDTVRAKDGNR --- EVPNVQVTDNRG TN -- A --- GKMLSVTQNDQKKTAD --- NKE LTGAALT 165  
BTH03758 KTQ-KASGNNE --- LYFAELDKVKKVVDGSLV --- DVPNVQVTDNRG TN -- A --- DKA IDGAALT 162  
BCU00752 GKX-NISGSDQ --- VYVAKLDTVRAKSGNR --- EVPNVQVTDNRG TN -- K --- GKMLTVKQNGQKAAE --- TE LTGAELK 173  
BTH03759 GEQ-VISGNDQ --- TYFAKLDKVNQSGKITV --- GYVNVVQVTDNRG TN -- A --- SE LTNAAIS 152  
EF02661 GAQ-KITSDTK --- DYVAQVQVTDKRG --- TGPNVQVTDKRG TQ -- E --- GMLSAVQNGQKTAQ --- NEELVGAALS 153  
EF00999 GTQ-KISTADO --- TYVAAPDEMRDGS --- KRPTVQVTDKRG TT -- A --- GKMLTLSQPEOKTAT --- GEE LVGAQLT 152  
A03344 3344A GTQ-KISTADK --- TYVAADVVMNDGS --- KRPTVQVTDKRG TT -- S --- GKMLSVSQPEOKTAS --- GDE LVGAQLK 153  
EF02287 GKN-KISNKDE --- KYVANPQVPLADGSGPDLTN --- PKPNVQVSDKRG TN -- A --- GMLTVKQETQVTDK --- ETKNV LDGSEIK 166  
LCA00296 GKQ-EITSETK --- TYFAAAQKQDAAGTEK --- VGNPVQVTDNRG TE -- A --- GKMLVVKQNDQVTSV --- GKE LTGAQIR 159  
EF01002 GWQ-KITSKDO --- TYFAATQKRYKIVGATDEVK --- EGPNVQVTDNRG TE -- A --- GMLKVKQEGQKSTTS --- GKE LTGAALT 158  
EF02663 GEQ-TITSKNN --- TYFAETQKRYKDNAGADQ --- EGPNVQVTDNRG TE -- T --- GMLTVKQNGQKTEA --- NQE LTAAKVT 160  
EF01000 GKN-KISNKDQ --- VYVAAQQVQENQK --- ETPNVQVSDNRG TN -- S --- GMLTVTQNEOKKATK --- ATINSQ LTGAQIS 158  
EF02662 GSN-EISNKDQ --- TYVARAQTYRNPDSASEL --- ATANVQVSDLRG TN -- A --- GMLRVKQNGQRNAE --- TLHKE LTGATVA 160



|              |              |        |        |          |                 |               |     |
|--------------|--------------|--------|--------|----------|-----------------|---------------|-----|
| BAT07090     | LTINPHSTYVEN | AGATS  | ESKLT  | YSIVTGP  | -----           | 201           |     |
| BCEA0046     | LTINPNSTYVEN | AGATS  | ESKLT  | YSIVTGP  | -----           | 201           |     |
| LSA1815      | LTASQTSD     | ---NGT | NAT    | SMDVNW   | TLAPITPSAKEN    | 171           |     |
| EF00405      | LTVPANTG     | ---EIN | KNY    | TATLW    | SLDDTP          | 284           |     |
| EF00406      | LTVPANTG     | ---EIN | KNY    | TATLW    | SLDDTP          | 284           |     |
| EF02238      | LTQTPVSQL    | ---EY  | ---GAY | TGSLI    | NLISGPV         | 239           |     |
| EF00338      | LTTPSSQL     | ---TN  | ---GAY | TGNVT    | TLVAAP          | 229           |     |
| EF02027      | VTTPVQQL     | ---KA  | ---GAY | TGNIT    | NLVAGPSI        | 232           |     |
| EF02028      | ITTPANNI     | ---KA  | ---GAY | TGNIT    | NLVAGPSI        | 236           |     |
| EF02029      | ITTPANNI     | ---KA  | ---GAY | TGSI     | NLVAGPSV        | 238           |     |
| LSA0611      | LHVPKTVN     | ---PTD | KAH    | QSDIT    | TLIASPNS        | 233           |     |
| LSA1811      | LKLSSEKSS    | ---LVA | ---GT  | QAPIT    | TLMDGQITLPTA    | 240           |     |
| LCA00327     | LKLSQNTA     | ---AVG | ---GK  | QTAIT    | TLTNAPA         | 220           |     |
| LCA00328     | LVAATNIV     | ---TAK | GRV    | QGAIT    | TLISNAPKG       | 234           |     |
| lp_2175      | LQVGRQSN     | ---LSA | ---GT  | VTATLY   | TLQNA           | PAAAAAATPKAAS | 243 |
| OOE1275      | ITLGQDTN     | ---VLA | ---GT  | YSGSVN   | VLTANTS         | SAETQGAE      | 191 |
| LLX01221     | LEVPAKTT     | ---P   | ---NQ  | YATLV    | NVVDGAPSE       | 176           |     |
| LCA00269     | LVLPKTSV     | ---VNN | ---GT  | YTTLT    | TLATGN          | 199           |     |
| LSA0177      | LTLPKDSK     | ---VGN | ---D   | LYTAHLT  | TLITGVQAS       | 294           |     |
| LSA1821      | VLAGAFA      | ------ | ---GD  | YTGQLT   | TLTATPEA        | 200           |     |
| LSA1287      | MAANPAAD     | ---A   | KDE    | AFSTI    | NLSSTAFVAFEA    | 203           |     |
| LBR00624     | LVPVAGQI     | ---A   | ---GR  | YATLW    | QLDDTPQ         | 199           |     |
| EF00403      | LEVPAANA     | ---KTN | ---QQ  | YGLT     | WLSNDTI         | 222           |     |
| PPE00558     | VSLLENGI     | ---REV | ---MD  | YSTA     | QNLTKTQTEQITE   | 162           |     |
| lp_3453      | LLVPAGNA     | ---A   | ---GAY | YSTLT    | WLGNA           | 190           |     |
| lp_3452      | LEVHDSQL     | ---EA  | ---GD  | YTGTLA   | SLTNAPS         | 230           |     |
| lp_3067      | LNVKANTV     | ---KA  | ---QA  | YSAN     | NLTLSDLP        | 233           |     |
| lp_2978      | LNVVANTA     | ---AA  | ---TY  | YGVLN    | TLTSSADN        | 260           |     |
| lp_3679      | LTVPANTA     | ---EA  | ---QG  | YOTLN    | SLSDTFAS        | 245           |     |
| lp_3412      | LHVKGGRV     | ---MA  | ---KNS | YGLT     | WLNLSLPSQ       | 274           |     |
| lp_3414      | LHVKGSHA     | ---AA  | ---KNS | YGNLV    | WLNSTPTA        | 269           |     |
| lp_1446      | LTVPGNTA     | ---QAG | ---QT  | YNTIV    | WLTANVTN        | 250           |     |
| lp_1449      | LSTPKLTA     | ---QV  | ---GN  | YNNLV    | WLVAAATN        | 226           |     |
| lp_1450      | LTTPKNTA     | ---KP  | ---GAY | YNTLT    | WLTAAATPS       | 234           |     |
| LIN00559     | LSTPQNTV     | ---ED  | ---GT  | YQSKLT   | WLSDTPAL        | 280           |     |
| LIN00554     | LSTPKNVA     | ---VAE | ---GT  | YQSTLT   | WLSDTPAV        | 280           |     |
| LMO00551     | LSTPKNVV     | ---VAD | ---GT  | YQSTLT   | WLSDTPAV        | 280           |     |
| EFA04241     | LKVPAAAA     | ------ | ---GT  | YADLT    | NLVAGPVA        | 226           |     |
| LIN00593     | LMIPAGSA     | ---TL  | ---GD  | HEAIT    | WLSDAPGV        | 237           |     |
| LMO00585     | LTIIPAGSA    | ---TL  | ---GD  | HEAIT    | WLSDAPGV        | 237           |     |
| LSA1725      | LTMPAGAE     | ---VTN | ---AL  | YMANLT   | WLSSTVA         | 325           |     |
| LSA0215      | LVMPDAA      | ---VAN | ---AL  | YKTSLT   | WLTETGK         | 327           |     |
| LCR01205     | LSVPAGSA     | ---KV  | ---D   | YTTLN    | NLW             | SAPGNA        | 270 |
| LLX01387     | LNVVAGSA     | ---KV  | ---D   | YTTLN    | NLW             | SAPGNA        | 270 |
| LCR01441     | LSVPAGVA     | ---GA  | ---AK  | YAD      | -----           | 240           |     |
| LLX01617     | LSVPAGVA     | ---GA  | ---AK  | YADLT    | WLTDDTPSN       | 251           |     |
| LCR00180     | LKVPSSGD     | ---LA  | ---GD  | YSTLW    | DLTAP           | 238           |     |
| LCR00710     | LSVPSSGA     | ---LA  | ---GN  | YATLQ    | DLTAP           | 235           |     |
| LCR01444     | LAVPAGLI     | ---EKA | ---AP  | YTDLY    | SLQAVPGND       | LDGNTSAVTPVP  | 281 |
| LLX01620     | LAVPAGLI     | ---EKA | ---AP  | YTDLY    | SLQAVPGND       | LDGNTSAVTPAP  | 281 |
| LCR01443     | LKVIAGTN     | ---KA  | ---TS  | YTTQL    | WLSLNTNTPGN     | 263           |     |
| LLX01619     | LKVIAGTN     | ---KA  | ---TS  | YTTQL    | WLSLNTNTPGN     | 263           |     |
| lp_3116      | LAVPGKTT     | ---KLA | ---TG  | YTTLT    | NLNDTPGN        | 190           |     |
| PPE00548     | LHVPAGV      | ---EA  | ---QS  | YSAELT   | WLTDA           | 217           |     |
| EFA03975     | LHVPVSNL     | ---AV  | ---DN  | YVSTL    | WLTDA           | PTEEEA        | 252 |
| lp_3073      | LMVPKTTA     | ---KAT | ---GS  | YSTLT    | WLSLNTAPNS      | 202           |     |
| LME00910     | LTVPASSR     | ---KE  | ---D   | YRTLT    | WLSDTAVE        | 259           |     |
| EF01893      | LTVPATTR     | ---KVA | ---Q   | YRTLT    | WLTDDTP         | 245           |     |
| EF02288      | LKVPKSV      | ---KLN | ---D   | AYTTLT   | WLTANTPV        | 258           |     |
| LCR01442     | LVVPGDTE     | ---KDA | ---T   | AVTTLN   | WLSLPTNAEN      | 252           |     |
| LLX01618     | LVVPGDTE     | ---KDA | ---T   | AVTTLN   | WLSLPTNVEN      | 252           |     |
| LCA00295     | LAVPGTSP     | ---KMA | ---E   | YVELT    | WLTLESTP        | INTPSEKS      | 257 |
| BCU00753     | LSVPKTK      | ---KEQ | ---AQ  | YTSLT    | WLTDA           | 251           |     |
| BTH03758     | LSVPKTK      | ---KEQ | ---NQ  | YTSLT    | WLTDA           | 249           |     |
| BCU00752     | LSVPGTTA     | ---GVK | ---D   | TKYKTSLT | WLTLEDTPQ       | 261           |     |
| BTH03759     | LSVPGTTA     | ---KEG | ---KA  | YSAELT   | WLTLEDTPN       | 242           |     |
| EF02661      | LNVPGKAT     | ---KLA | ---E   | YRTLT    | WLTKSVPTNVGG    | 244           |     |
| EF00999      | LHVPKSV      | ---KLA | ---Q   | YSTKL    | WLV             | LEDTPANN      | 243 |
| A03344_3344A | LSVPGKSV     | ---KLA | ---Q   | YSTKL    | WLV             | LEDTPNN       | 243 |
| EF02287      | LTVPGATE     | ---KDA | ---V   | QYKTVL   | WLTLEDLPSV      | 260           |     |
| LCA00296     | LTVPGATT     | ---KLA | ---E   | KYATL    | WLTLEDTPDNK     | 247           |     |
| EF01002      | LTVPGSTT     | ---KNA | ---E   | KYATL    | WLTLEDAPGN      | 246           |     |
| EF02663      | LEVPGSTT     | ---KLA | ---K   | YTTT     | WLTLEDTPANTGN   | 252           |     |
| EF01000      | LSVPGSTP     | ---KDA | ---V   | KYQTKLL  | WLTLEDVPGI      | 259           |     |
| EF02662      | LTVPKTE      | ---KDA | ---V   | QYKTVL   | WLTLEDVPPVNNGGK | 266           |     |

**Figure 5:**

Multiple sequence alignment of CscB proteins. Proteins IDs can be found in additional file Table 5. Colour coding of highly conserved residues: green, hydrophobic (L, M, I, V); blue, aromatic (W, F, Y); red, basic (R, K, H); light brown, neutral and small (P, G, S, T).
