# Supplementary material for: Lactobacillus plantarum gene clusters encoding putative cell-surface protein complexes for carbohydrate utilization are conserved in specific gram-positive bacteria
Source: PubMed Central journal article supplement (PMC1534035; doi:10.1186/1471-2164-7-126), 2006-05-24
Supplement: 1471-2164-7-126-S8.pdf [file 1471-2164-7-126-S8.pdf]

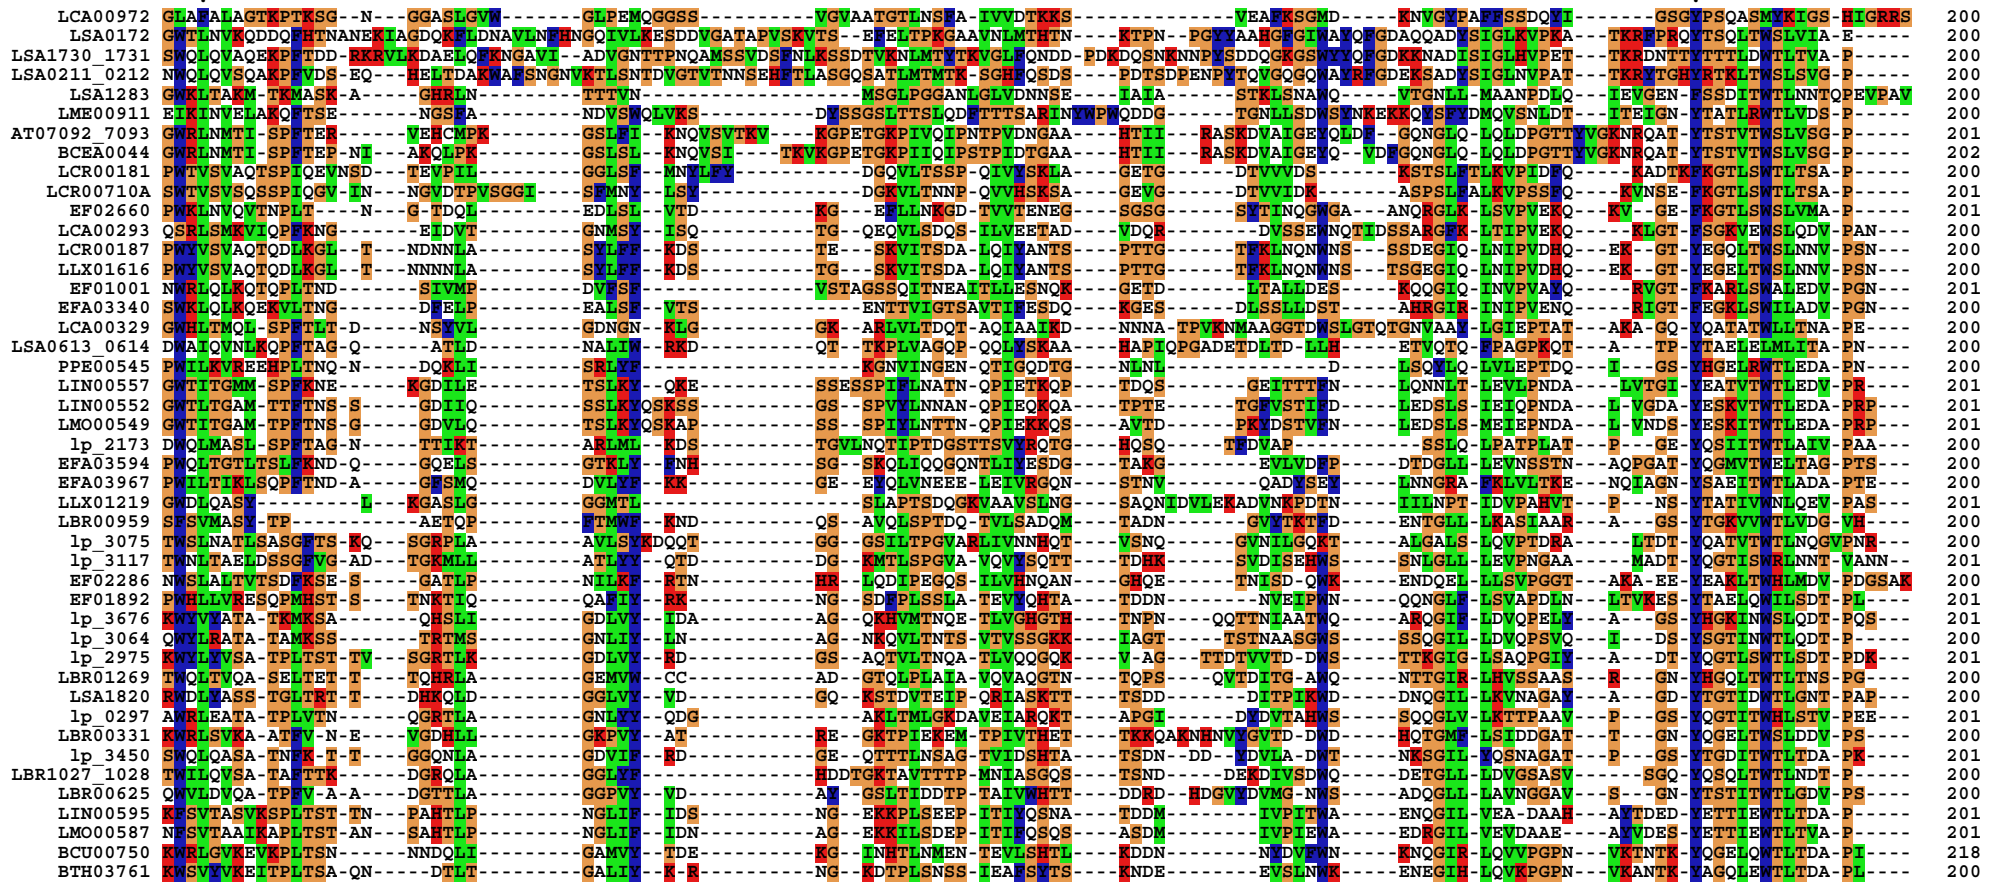

**Figure 6:**

Multiple sequence alignment of CscC proteins. Only the last 200 residues are shown. Proteins IDs can be found in additional file Table 5. Colour coding of highly conserved residues: green, hydrophobic (L, M, I, V); blue, aromatic (W, F, Y); red, basic (R, K, H); light brown, neutral and small (P, G, S, T).
