# Supplementary material for: Lactobacillus plantarum gene clusters encoding putative cell-surface protein complexes for carbohydrate utilization are conserved in specific gram-positive bacteria
Source: PubMed Central journal article supplement (PMC1534035; doi:10.1186/1471-2164-7-126), 2006-05-24
Supplement: 1471-2164-7-126-S11.pdf [file 1471-2164-7-126-S11.pdf]

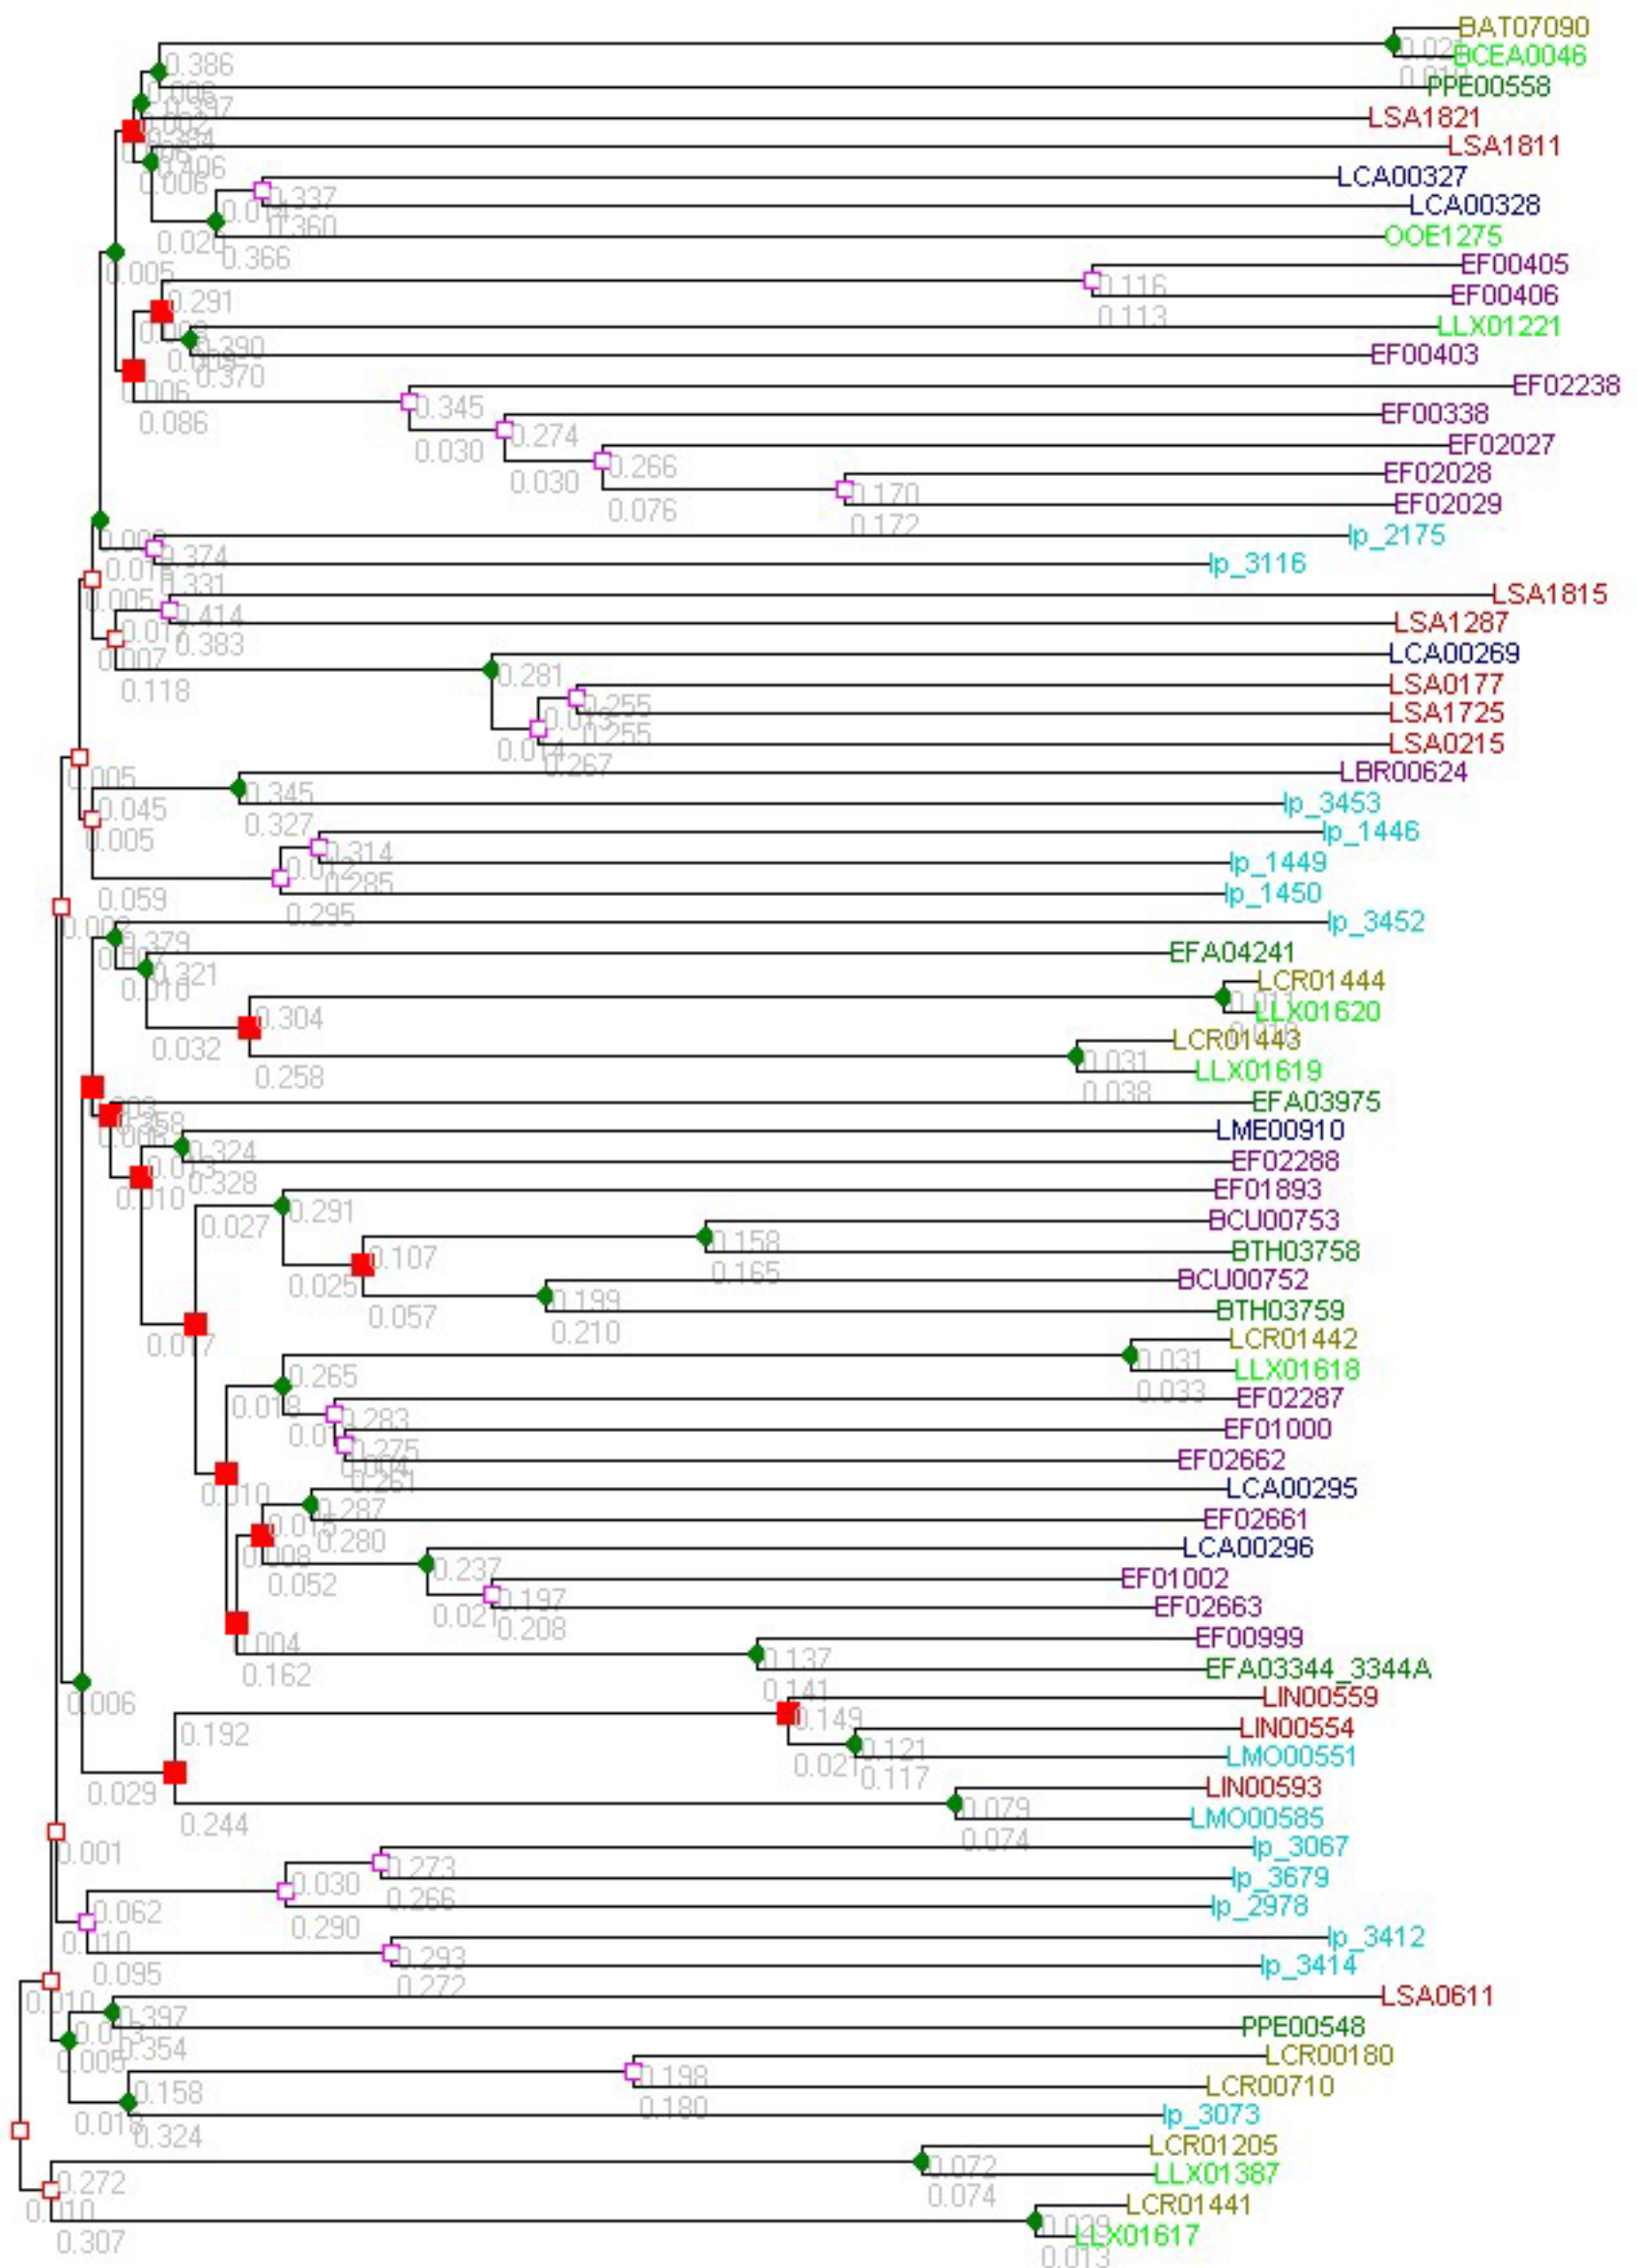

**Figure 9:**

Protein family tree of CscB proteins, based on alignment in Figure 5 (additional file). Proteins from the same species have the same colour coding. Green dots represent speciation events, and squares represent duplication events (see [1] for details of method).

1. van der Heijden RTJM, Snel B, Huynen MA: LOFT: High resolution multi-level orthology prediction through automated analysis of phylogenetic trees. In: submitted. 2005.
