# Supplementary material for: Lactobacillus plantarum gene clusters encoding putative cell-surface protein complexes for carbohydrate utilization are conserved in specific gram-positive bacteria
Source: PubMed Central journal article supplement (PMC1534035; doi:10.1186/1471-2164-7-126), 2006-05-24
Supplement: 1471-2164-7-126-S13.pdf [file 1471-2164-7-126-S13.pdf]

**Figure 11: Multiple sequence alignment of ConA-like lectin/glucanase domains with known 3D structures of lectins.** Putative ConA-like domains (amino acid numbering in brackets) of representative CscC proteins of *Enterococcus faecalis* (EF), *Enterococcus faecium* (EFA), *Lactobacillus plantarum* (LPL) and *Lactobacillus brevis* (LBR). Known 3D structures with PDB codes: 1hq1, lectin, *Glechoma hederacea* (Ground-ivy); 1n47, lectin B4, *Vicia villosa* (Hairy vetch); 1qnw, anti-H(O)lectin 2, *Ulex europaeus* (Furze); 1bqp, lectin(precursor), *Pisum sativum* (Garden pea). The coloured residues represent conserved ligands of divalent metal ions ( $Mn^{2+}$  or  $Mg^{2+}$ ).

```

1hq1      --IRLTTSHT---WSVGRVMYSKPLTFWG--EGKQVHFKTKISFNITSIAGNKA-DGVAL
1n47      --LELTKNKGPVPELGRN-----CTTLASFTTSFVMSAPNSLDVADGLAF
1qnw      --LQVTKVSKPTTTSIGRALYAAPIQIWDSITGKVASFATSFSFVVKADKSDGV-DGLAF
2bqp      --LQLTKAVK---NSIGRALYSAPIHIWDSKTGDVANFETLFTFAITAPYSSNVADGLAF
EFA03340 (125-335) --LQLNPAER---SQRG-AIWSNK--KIS--LLSDFTFKSYLYLG--NQRDRAG-DGMTF
EF01001 (150-359) --LQLNPAVK---SQKG-AIWSKK--PIS--LLSDFTFKSYLYLG--NEYANAG-DGMTF
LPL0297 (66-301)  HVIELTND---NQVG-AMWSTFVNRFN--MRVDNQVSMWVNFV----DKAVS-EGLAV
LPL3450 (75-333)  QAVQVINGK---KQMG-GFWSNDANRLD--LNKNATFKMWVYLGSTSTSTSKAG-DGMAF
LBR01269 (64-320) HGLQITEGN---NHAG-SAWATNNYKVD--LSKDATFSLWLYLG-KGGAGSAG-QGMTF
LBR00625 (76-335) ---MVNNT---YQFG-SIWSTDENYFD--LTQDETASMWLYFG--NQGTQAA-DGMAF
LBR00331 (73-344) ---SMTRHQ---SEYA-SIWSKHGSEFE--LTKPQTSMWLYFG--NQYSASG-EGMAF
          :           .           . :           :* :

```

```

1hq1      FM-----VPVGPPIPNGGAGGNLGLFDSSGVGKS-----IFAVKFDTH-
1n47      FL-----APPDTP--QKRGGFLGLFKDRKHDIS-----YQSVAVEFDTY-
1qnw      FL-----APANSQIPSGSSAGMFLFSSSDSKSS-----NQI IAVEFDTYF
2bqp      FI-----APVDTQPQNI GRAGFLGVFNSETYNKS-----IQTVAVEIDTF-
EFA03340 (125-335) TLTGDPRMASNPSQVI---GSPGMGIGSYSTRSGQPY-----IANALSIEFDITYK
EF01001 (150-359) TLTNDPRMSTTPQEV---GSPGMGIGAYSTKAGQPY-----VRNALSIEFDITYK
LPL0297 (66-301)  VLQNDPHKMSAISRYGK-KS IIGENLGVYGTDTYTRRTAPATIAKTAIQSWALELDTKV
LPL3450 (75-333)  VLQNDPNGTAASAQVSS--SSI IGETLGWVGVDTDNKLKDGEEFAKTAIQNSWALEFDITYT
LBR01269 (64-320) VLQNAG---ATGFTTI PAGRMAGQSLGTWGLDFNSTAADATAAVAAAAIISKSWALEFDQV
LBR00625 (76-335) VLQNDPRGVAAIPDYPTPGKAIGETLGWVGVDMARRQGSVDKLAQTAIQSWALEFDTNR
LBR00331 (73-344) AIHNDARGVNAMELNNKKSVPGETLGWVPSDTPVRTQGEAADLAKRGIQNSWALEFDTHQ
          :           :* :           :* :

```

```

1hq1      -----ANVWDPPCR-----HIGINVNSRVPVAHKCMDSDSVNWEDVTL-----S
1n47      -----SNVWDPNNT-----HIGIDTNTIESKKITP-----
1qnw      G-----KAYNPWDPDFK-----HIGIDVNSIKSIKTVK---W-DWRNGEVADVIT
2bqp      -----HNTWDPKINR-----HIGINVNCIKSISTTS---WVLENGREANVLV-R
EFA03340 (125-335) NS-----GSSDRMDREITAD---NRGHGHVAFVTPKPNN-----
EF01001 (150-359) NT-----GSSNRMDREISQ-----DKGNHGLAFVTPKANN-----
LPL0297 (66-301)  NDGGFWGLYPRGNSFDEKPKKM---HMAASYPASPDYTYTQR-----GGLTSS
LPL3450 (75-333)  NTSTSYSNAGKGSFDGDIKKQ---HIATGYPGLASQYENQ---SVRSLDVTGIWSTR
LBR01269 (64-320) NDSRDG---GDNNGFDYNYINTTQ-HIASNYPAQVSSYSRN---GTAMSGA-----K
LBR00625 (76-335) NASTGGKAAGYANSFDIGMPPV---HIGSNYPGAGSSYIRHVDHGLPVLGI IQPD---N
LBR00331 (73-344) NIKSGGRAAGQADSFDLEFENSKVGDHIASNHPGSSASFIQHVDSGVLWTGNTPINVM-H
          :   *           .

```

```

1hq1      INYDEADKIITVRAQ---VGLTKHYDLSHKLDLSTI-----
1n47      --FDMVYGEKILFAS-----LVFPVSQD-----
1qnw      YRAPTKSLTVCLSY-----SDGTSNIITASVDLKA-----
2bqp      FDAHTNVLSVLSYP-----GLPDSYILSDVVPLKDI-----
EFA03340 (125-335) NNYSGEHTGVTVAPT---FLSNGTWRLLI IKWDAEQR-----SLTYDLEGV-----
EF01001 (150-359) NNYTGEHSGVTVAPT---YLSNGTWRMLTVHWAATK-----ALTYDLEGV-----
LPL0297 (66-301)  YRFEQNHGSIADKLP---LADGNWHLVVKWVASKQ-----IMSYTLQD-----
LPL3450 (75-333)  YYFTQKHTNLVTNMS---LGDSKWHHLVMDWHAATK-----TMTYTYNDINPDGSATG
LBR01269 (64-320) YFYLNHQGKLNATL---SDGTWHHLTLAWTAPTD-NSNTGVSVYTYTFNDKNPTTGASQ
LBR00625 (76-335) YYYGLNHLGVIADQSQPNFLSNGQWHHVTLVSWKAATK-----QMTYTFNDKDPQTGAMQ
LBR00331 (73-344) YYYHIQHVGMIGDKSNSNYLSNGQWRHLTLKWKQPANHEGNSYGMQTYVDDKDKPKTGERL

```

```

1hq1 -----LEKKVQVGLSASTG---TNIALHDINYWEF
1n47 -----ILPEYVRVGFSAATTGLNEGJVETH-----
1qnw -----LPEWVSVGFSGGVGNA-AEFETHDVLSWYF
2bqp -----VPEWVRIGFSAATG---AEFAEHDIRYWSF
EFA03340 (125-335) -GRSSRIIPDLIRQFG-----STEVNWGFTSSTGTFQEN-AVAVTRLPS
EF01001 (150-359) -GTNTYVVS DLNAQFG-----ATTVYWGFTSSTGGKYQEN-ALAMTQIPT
LPL0297 (66-301) -GPTRMTTIDTTVFGK-----DIRNVTWGLTSTATTANART-LVVFDRLPQ
LPL3450 (75-333) SGFTQSEVLDTSQFNS-----SDGLVRWGFMGATGSNSGNN-MVVIESAPN
LBR01269 (64-320) SGQSATISLDLSKLG I--NVDVTKIVTWGFTGVSGTFGTNN-VVAFEHIPG
LBR00625 (76-335) PGVSR TVTLDPAKIDP-----NNTGKIRWGFTGATGSRYENN-LVVFESVPG
LBR00331 (73-344) NGREQTVNVNVTIDP-----DRNGKARWGLAGTTTTKFASNQLVVF EKAP-

```

\*:

```

1hq1.pdb: Lectin, Glechoma hederacea (Ground-ivy)
1n47.pdb: Lectin B4, Vicia villosa (Hairy vetch)
1qnw.pdb: Anti-H(O)lectin 2, Ulex europeus (Furze)
1bqp.pdb: Lectin(precursor), Pisum sativum (Garden pea)

```
